# 1 **Quantitative understanding of molecular competition as a hidden** 2 **layer of gene regulatory network**

3

4 Ye Yuan<sup>1,5</sup>, Lei Wei<sup>1,5</sup>, Tao Hu<sup>1</sup>, Shuailin Li<sup>1</sup>, Tianrun Cheng<sup>1</sup>, Jinzhi Lei<sup>2</sup>, Zhen Xie<sup>1</sup>, Michael  
5 Q. Zhang<sup>1,3,4</sup>, Xiaowo Wang<sup>1,\*</sup>

6

7 <sup>1</sup> Ministry of Education Key Laboratory of Bioinformatics, Center for Synthetic and Systems Biology, Department  
8 of Automation, Tsinghua University, Beijing, 100084, China

9 <sup>2</sup> Zhou Pei-Yuan Center for Applied Mathematics, Tsinghua University, Beijing, 100084, China

10 <sup>3</sup> Department of Basic Medical Sciences, School of Medicine, Tsinghua University, Beijing 100084, China

11 <sup>4</sup> Department of Biological Sciences, Center for Systems Biology, The University of Texas, Richardson, TX 75080-  
12 3021, USA

13 <sup>5</sup> These authors contributed equally to this work

14 \* Correspondence: xwwang@tsinghua.edu.cn

15

## 16 **Abstract**

17 Molecular competition is ubiquitous, essential and multifunctional throughout diverse  
18 biological processes. Competition brings about trade-offs of shared limited resources  
19 among the cellular components, and it thus introduce a hidden layer of regulatory  
20 mechanism by connecting components even without direct physical interactions. By  
21 abstracting the analogous competition mechanism behind diverse molecular systems,  
22 we built a unified coarse-grained competition motif model to systematically compare  
23 experimental evidences in these processes and analyzed general properties shared  
24 behind them. We could predict in what molecular environments competition would  
25 reveal threshold behavior or display a negative linear dependence. We quantified how

26 competition can shape regulator-target dose-response curve, modulate dynamic  
27 response speed, control target expression noise, and introduce correlated fluctuations  
28 between targets. This work uncovered the complexity and generality of molecular  
29 competition effect, which might act as a hidden regulatory mechanism with multiple  
30 functions throughout biological networks in both natural and synthetic systems.

31

32 **Keywords**

33 systems biology, computational modelling, molecular competition regulation, synthetic  
34 biology, network motif

35

## 36 **Introduction**

37 Competition for limited resources matters at all scales of biology. Competition among  
38 different species can alter population distributions and ecological niches (Connell, 1983;  
39 Hardin, 1960; Schoener, 1983). Competition among individuals of the same species  
40 may slow down the growth rates of all competitors, driving natural selection and  
41 evolution (Bolnick, 2004; Svanback & Bolnick, 2007; Zwietering et al., 1990).  
42 Competition among adjacent cells in an organism can regulate their growth and viability,  
43 and enhance the dominance of cells with better fitness (Chang et al., 2015; Johnston,  
44 2009; Khare & Shaulsky, 2006; Laird, 1964). In a microscopic scale, biological  
45 molecules within cells also face competition. Competition brings about trade-offs of  
46 shared limited resources among the cellular components (Hui et al., 2015; Scott et al.,  
47 2010; Weisse et al., 2015), and it thus introduces a hidden layer of regulatory  
48 mechanism by connecting components even without direct physical interactions.  
49 Miscellaneous phenomena caused by molecular competition have been reported in a  
50 variety of biological processes in diverse organisms. For example, DNA binding sites  
51 on plasmids can compete for transcription factor (TF) LacI to dictate its target gene  
52 expression in *E. coli* (Brewster et al., 2014). Noncoding RNAs transcribed from  
53 enhancer or promoter region can competitively bind to TF Yin-Yang 1 to trap the TF  
54 locally thus maintain gene expression stability in mouse embryonic stem cells (Sigova  
55 et al., 2015). mRNA, long-noncoding RNA and circular RNA molecules can  
56 competitively bind to microRNAs (miRNAs) to regulate various processes, such as cell

57 growth (Zheng et al., 2016), cell differentiation (Cesana et al., 2011) and tumor  
58 suppression (Sumazin et al., 2011). Competition between RNA binding proteins PGL-  
59 3 and MEX-5 for mRNA drives polar positioning of phase-separated liquid  
60 compartments in *C. elegans* embryos (Saha et al., 2016). Furthermore, competition  
61 effects are especially important in synthetic gene circuits. Every synthetic gene  
62 inevitably competes for common resources with each other in circuits and with  
63 endogenous biological processes, introducing unexpected circuit failures or host  
64 metabolic burdens (Cardinale & Arkin, 2012; Qian et al., 2017; Wu et al., 2016). In  
65 addition, when one genetic element drives two or more downstream elements,  
66 competition will modulate the dynamics of signal transduction (Jayanthi et al., 2013;  
67 Jiang et al., 2011). As a result, characteristics of each single component are insufficient  
68 for the accurate prediction of the whole circuit behavior, posing a serious obstacle in  
69 synthetic circuit design and application.

70       Several mathematical frameworks and synthetic gene experiments have been built  
71 to quantitatively understand the diverse biological phenomena caused by competition.  
72 For example, a thermodynamic model was used to explain the TF titration effect in *E.*  
73 *coli* (Brewster et al., 2014). Kinetic model has been adopted to analyze competing  
74 endogenous RNA (ceRNA) regulation (Ala et al., 2013), and we further quantified the  
75 ceRNA effect through synthetic gene circuits in human cell line (Yuan et al., 2015). A  
76 minimal model based on delay differential equations was established to describe  
77 ribosome allocation between endogenous and synthetic genes in *E. coli* (Gorochofski

78 et al., 2016). Queueing theory was introduced to describe the protein degradation  
79 process in *E. coli*, where target proteins as queues compete for degradation machine  
80 ClpXP as server (Cookson et al., 2011; Mather et al., 2010). However, common  
81 properties and underlying competition mechanisms in essence behind these diverse  
82 phenomena have not been systematically analyzed yet.

83 Here we propose that regulations by competition are ubiquitous, essential and  
84 multifunctional through diverse biological regulatory processes. By abstracting the  
85 analogous competition motif shared by diverse molecular systems, we built a unified  
86 coarse-grained kinetic model to systematically integrate experimental evidences in  
87 diverse biological processes and analyze the common properties shared among them.  
88 We organized these properties from steady-state behavior to dynamic responses, to  
89 quantify how competition could introduce constraints and indirect regulations among  
90 the targets and how the existence of competitors might influence regulator-target  
91 response characteristics. This work demonstrated the complexity and generality of the  
92 molecular competition effect, which is a ubiquitous hidden regulatory mechanism with  
93 diverse functions throughout different biological processes in both natural and synthetic  
94 life systems.

95

## 96 **Results**

### 97 **A unified coarse-gained competition motif model**

98 A number of phenomena caused by molecular competition have been reported in  
99 diverse biological systems recently (Brewster et al., 2014; Saha et al., 2016; Sigova et  
100 al., 2015; Zheng et al., 2016). Do they share any common properties? Could they be  
101 described by a unified model? We summed up several representative competition  
102 scenarios following the life cycle of gene expression (Figure 1), including competitions  
103 for transcription factors by DNA binding sites (Figure 1B), competitions for miRNAs  
104 and ribosomes by RNA molecules (Figure 1C and 1D), and competitions for  
105 degradation enzymes by target proteins (Figure 1E). Inspired by previous models  
106 studying ceRNA effect (Ala et al., 2013; Yuan et al., 2015), we proposed a generalized  
107 competition motif model, in which two target molecule species (target#1 and #2,  $T_1$  and  
108  $T_2$ ) competitively bind with a shared regulatory molecule species (regulator,  $R$ ) (Figure  
109 1A), to describe the similar competition topology these cases share. In this model, each  
110 molecule species is produced and degraded with certain rates, and the regulator is  
111 dynamically bound to targets following biochemical mass-action laws to form  
112 complexes (Figure 1F, SI Material and Methods). Loss rates of regulator ( $\alpha$ ) and its  
113 competing targets ( $\beta$ ) were introduced to describe reactions from pure stoichiometric  
114 ( $\alpha \sim 1, \beta \sim 1$ ) to pure catalytic ( $\alpha \sim 1, \beta \sim 0$  where enzymes act as competitors, or  $\alpha \sim 0,$   
115  $\beta \sim 1$  when substrates act as competitors) (Ala et al., 2013). In different biochemical  
116 scenarios, experimentally measured signals may reflect different component levels of  
117 the competition motif. For example, the activity of targets could be mainly reflected by

118 the abundance of complexes ( $T^C$ ) when the regulator is an activator, or by the abundance  
119 of the free targets ( $T^F$ ) when the regulator is a repressor.

120 This unified model can describe competitions in various biological processes  
121 (Figure S1A-D). Despite of different parameter settings, all these cases share the core  
122 competition motif structure, suggesting that they may share common characteristics. In  
123 the following sections, we used this model to analyze, in the scenario of either steady-  
124 state behavior or dynamic response, how the competition introduces indirect  
125 regulations between targets and how the existence of the competitors influences the  
126 property of regulator-target response.

127

### 128 **Relative abundance determines the regulatory patterns between competitors**

129 Competition can cause crosstalk between targets. By quantifying the competition effect  
130 of one target upon the abundance of another target, recent studies have reported two  
131 apparently different steady-state behaviors named “threshold behavior” of ceRNA  
132 regulation in mammalian cells (Ala et al., 2013) and “negative linear dependence”  
133 behavior of synthetic gene expression in bacteria (Carbonell-Ballester et al., 2016;  
134 Gyorgy et al., 2015). How could competition generate such two vastly different  
135 phenomena?

136 The model predicted that the relative abundance between regulator and target  
137 determines the diverse behaviors. Figure 2A and S2A illustrates how molecular  
138 abundance changes along with the gradual increment of  $T_2$ 's production rate. The

139 system went through three regimes: “*R* abundant”, “*R* near-equimolar” and “*R* scarce”,  
140 which are mainly determined by the production rate and loss rate of each component  
141 (SI Material and Methods). In the “*R* abundant” regime, free  $T_1$  level ( $T_1^F$ ) is not  
142 sensitive to the increment of free  $T_2$  level ( $T_2^F$ ), but when the system enters the “*R* near-  
143 equimolar” regime,  $T_1^F$  becomes more sensitive to  $T_2^F$  changes, thus generates the  
144 threshold behavior (Figure 2B and S2B). In contrast,  $T_1$  complex level ( $T_1^C$ ) is  
145 substantially unchanged with respect to  $T_2$  complex level ( $T_2^C$ ) except in the “*R* scarce”  
146 regime, where  $T_1^C$  displays a negative linear dependence with  $T_2^C$  (Figure 2C).

147 In the case of ceRNA regulation, where miRNA is a repressor, target activity can  
148 be reflected by the free mRNA level. Increments of ceRNA<sub>2</sub> ( $T_2^F$ ) can raise free ceRNA<sub>1</sub>  
149 ( $T_1^F$ ) level indirectly by sequestering shared miRNAs. Such derepression caused by  
150 ceRNA effect is negligible when the level of ceRNA<sub>2</sub> is far less than that of miRNA (in  
151 the “*R* abundant” regime), but becomes detectable when the level of ceRNA<sub>2</sub> is  
152 comparable to that of miRNA (in the “*R* near-equimolar” regime) (Ala et al., 2013;  
153 Yuan et al., 2015). In contrast, when the regulator is an activator, target activity can be  
154 represented by the level of complexes. Recently a phenomenon called “isocost line”  
155 behavior, originally studied in economics, was also found in synthetic biological  
156 systems (Carbonell-Ballester et al., 2016; Gyorgy et al., 2015) that the expressions of  
157 two fluorescent proteins in *E. coli* displayed negative linear dependence, which was  
158 caused by competition for the transcription and translation resources (acting as activator)



159 by the two synthetic genes. Due to the high expression level of these genes, the system  
160 was always restricted to the “ $R$  scarce” regime, thus showed negative linear dependence.

161 In summary, threshold behavior and negative linear dependence are two aspects  
162 generated by the same competition motif. The threshold behavior is observed when the  
163 regulator is a repressor and the system transfers from the “ $R$  abundant” to the “ $R$  near-  
164 equimolar” regime; while the negative linear dependence occurs when the regulator is  
165 an activator and the system is restricted to the “ $R$  scarce” regime.

166

### 167 **Competition can shape dose-response curve**

168 How does competition modulate the response of target to varying levels of a regulator?

169 The dose-response curve, which quantitatively describes the magnitude of such  
170 responses, was systematically analyzed. Firstly, the dose-response curve of free  $T_1$  ( $T_1^F$ )  
171 level to the total regulator ( $R$ ) level without competition effect (without  $T_2$ ) was  
172 calculated as the baseline. As expected (Buchler & Louis, 2008),  $T_1^F$  was not sensitive  
173 to the regulator changes in the “ $R$  scarce” regime, but became sensitive in the “ $R$  near-  
174 equimolar” regime, thus forming some “threshold behavior” (black line in Figure 2D-  
175 E). Then we analyzed how the molecular levels and the kinetic parameters of the  
176 competitor  $T_2$  might influence the shape of the  $R$ - $T_1^F$  dose-response curve. We first  
177 considered the case that  $T_1$  and  $T_2$  have the same kinetic parameters to bind  $R$ .  
178 Increments of  $T_2$  production could elevate the maximum sensitivity to enhance the  
179 threshold behavior, and shift the position of the maximum sensitivity to a higher  $R$  level

180 in the new “ $R$  near-equimolar” regime (Figure 2D-E). We next fixed  $T_2$ ’s production  
181 rate and analyzed the influence of other kinetic parameters. The relative binding affinity  
182 was found as the key parameters to modulate the  $R$ - $T_1^F$  dose-response curve. If  $T_2^C$  was  
183 formed slowly (small  $k_{2+}$ ) or dissociated rapidly (large  $k_{2-}$ ),  $T_2$  could hardly alter the  $R$ -  
184  $T_1^F$  response. Along with the increment of  $T_2$  binding affinity (increasing  $k_{2+}$  or  
185 decreasing  $k_{2-}$ ),  $T_2$ ’s competition blunted the sensitivity in the  $R$ - $T_1$  near-equimolar  
186 regime considering only  $R$  and  $T_1$ , meanwhile enhanced the sensitivity in the  $R$ - $T_1+T_2$   
187 near-equimolar regime in the presence of  $T_2$  (Figure 2F-G and S2C-E).

188 The model analysis is consistent with the experimental observations in diverse  
189 molecular competition scenarios reported previously. In the case of ceRNA (Figure 1C),  
190 the RNA competitors with comparable binding affinities can enhance the maximum  
191 sensitivity and shift their positions in the miRNA-target dose-response curve, and a  
192 higher competing RNA level can cause a stronger enhancement and shift (Yuan et al.,  
193 2015). Similarly, in the studies on the TF titration effect (Figure 1B), introducing high  
194 affinity competitive binding sites can greatly shift and sharpen the response of primary  
195 target gene expression to the TF (Brewster et al., 2014; Lee & Maheshri, 2012). In  
196 contrast, in the case of buffer solutions in chemistry, for example the ammonium buffer,  
197 the weak base  $\text{NH}_4^+$  compete with  $\text{H}^+$  for  $\text{OH}^-$ , and  $\text{NH}_4^+$  has a much lower binding  
198 affinity with  $\text{OH}^-$  than  $\text{H}^+$  (Figure S1E). When a mild change of  $\text{OH}^-$  (e.g. adding  
199 moderate amounts of NaOH or HCl) is introduced into the solution,  $\text{NH}_4^+$  can buffer  
200 the response of free  $\text{H}^+$  to  $\text{OH}^-$ , thus keeping pH (potential of hydrogen) almost constant

201 in a certain range (SI Material and Methods). In summary, introducing the competitors  
202 can shape the  $R-T_1^F$  dose-response curve. A high affinity competitor can enhance the  
203 maximum sensitivity and shift its position to a higher  $R$  level; while a low affinity  
204 competitor may buffer the response. The extents of such modulations are dictated by  
205 the abundance of competitors.

206 However, it should be noticed that when it comes to the response curve of a free  
207 primary target to the level of a free regulator ( $R^F-T_1^F$ ), the curve was not influenced by  
208 the existence of competitor at all (Figure 2H). This is because, rather than the total  
209 regulator abundance, the free regulator abundance is the one effectively determines the  
210 kinetic reaction rate with each single target (Jens & Rajewsky, 2015). Thus, responses  
211 of two or more targets to the shared regulator are mutually independent given the level  
212 of  $R^F$ , which provides an efficient way, by using  $R^F$  level as the medium, to analyze the  
213 relative regulatory efficiency among multi-targets (Yuan et al., 2016). Once given the  
214 dose-response of each component ( $R^F-T_i^F$ , which could be separately measured or  
215 calculated) and the expected regulatory efficiency of a specific target, the level of all  
216 other targets could be immediately predicted because they are all exposed to the same  
217 free regulator level (Figure 2I, SI Material and Methods). Such property is especially  
218 important for designing synthetic circuits, where we know the characteristics of each  
219 single part and would like to predict the whole system's behavior when putting them  
220 together. This property has been applied to siRNA design principle: by both *in silico*  
221 simulation and experimental validation, we found that the influence of a high off-target

222 gene expression level could be compensated by introducing a suitable number of  
223 siRNAs, whereas off-target genes with strong binding affinity should be avoided (Yuan  
224 et al., 2015; Yuan et al., 2016). In summary, the dose-response to the free regulator level  
225 is not influenced by any competitors, therefore providing an efficient way to extract the  
226 relative response relations in multi-target networks.

227

### 228 **Competition can delay or accelerate dynamic response**

229 How does the existence of competitors influence the dynamic behavior of the system  
230 in response to a time-varying regulator? To answer this question, we simulated the  
231 response of a switching system with regulator level changing between “ON” and “OFF”  
232 states (Figure 3A). On the rising edge of  $R$ 's change, the existence of  $T_2$ 's competition  
233 always delays the response of both  $T_1^F$  and  $T_1^C$ , because it can sequester  $R$  from binding  
234 with  $T_1$  and may cause additional  $R$  loss via  $T_2^C$  degradation, both of which resist the  
235 increment of available  $R$  to regulate  $T_1$ . However, on the falling edge, competing can  
236 either accelerate or delay the response depending on the kinetic parameters (Figure 3B-  
237 C and S3A-F, SI Material and Methods). On the one hand,  $T_2^C$  dissociation could  
238 compensate  $R$ 's decrease, but on the other hand,  $T_2^C$  degradation may cause  $R$  loss, and  
239 these two opposing effects can dominate the final modulation of the dynamic response.  
240  $T_2$  with a large complex degradation rate ( $g_2$ ) and a large loss rate ( $\alpha_2$ ) could lead to a  
241 quick response by mediating more  $R$  loss (Figure 3B); while  $T_2$  with different binding  
242 affinities could either accelerate or delay the response under different parameter settings

243 (Figure 3C and S3C-F), because  $T_2$  with a strong binding affinity can enhance both  $R$   
244 compensation and  $R$  loss via  $T_2^C$  degradation at the same time.

245 Recently, it has been experimentally observed that the competition for LacI binding  
246 in *E. coli* delayed the rising edge response, but accelerated the falling edge response  
247 because of the loss of the regulator binding with targets through degradation and  
248 dilution (large  $\alpha_2$ ) (Jayanthi et al., 2013). On the contrary, the existence of competitive  
249 binding sites for transcription factor SKN7m in *S. cerevisiae* was found to delay the  
250 response of the primary target on both the rising and the falling edges (Mishra et al.,  
251 2014), which implied that the regulator might be protected from degradation when  
252 binding with targets ( $g_2$  is small) (Burger et al., 2010; Jayanthi et al., 2013). In summary,  
253 competition can modulate the dynamic response of some targets to their upstream  
254 regulators. This may implicate a general parameter tuning method to adjust the response  
255 dynamics in the presence of the competitors.

256

### 257 **Competition can modify target expression noise level**

258 Competition can modulate the sensitivity and the speed of a target response to a  
259 changing regulator, both of which are highly relevant to target fluctuation (Blake et al.,  
260 2003; Chen et al., 2013). A natural question is how the existence of competitors may  
261 influence noise in the system? Here we took miRNA regulation as an example to  
262 analyze the noise level of protein products (Figure 3D, SI Material and Methods). In  
263 systems without  $R$  and  $T_2$ ,  $T_1$  expression noise is derived from fluctuations in

264 transcription, translation and degradation, and the coefficient of variance (CV) of  $T_1$   
265 gene expression approaches the “power law”, as expected by the “ $1/\sqrt{N}$  rule”  
266 proposed by Schrödinger (Schrödinger, 1944). The introduction of  $R$  (miRNA) as  
267 repressor can decrease the noise of lowly expressed genes, meanwhile generate a noise  
268 peak in the “ $R$  near-equimolar” regime for highly expressed genes (Figure 3E),  
269 consistent with previous studies (Bosia et al., 2017; Schmiedel et al., 2015).

270 Theoretical results indicated that the competition effect of  $T_2$  could modify  $T_1$   
271 expression noise significantly. As expected, introducing  $T_2$  weakens  $R$ 's ability to  
272 suppress  $T_1$ , thus may impair the noise reduction in the low expression zone.  
273 Interestingly, in the high expression zone of  $T_1$ ,  $T_2$  with strong binding affinity with  $R$   
274 may elevate  $T_1$  noise level (Figure 3F); while  $T_2$  with weak binding affinity may  
275 substantially depress  $T_1$  noise level (Figure 3G). Therefore, comparing with the one-  
276 regulator-one-target scenario, introducing higher level of miRNAs and compensable  
277 weak competitors could reduce target expression noise at the low expression zone and  
278 suppress the noise peak introduced by miRNA at the high expression zone at the same  
279 time, thus could repress gene expression noise in a wide range (Figure 3H). In summary,  
280 competition effects may modulate gene expression noise level, and in particular,  
281 abundant weak competitors have the capability to buffer gene expression noise globally  
282 (Figure S3G-J).

283

284 **Competition can introduce correlated fluctuation between targets**

285 Competition can not only modify the strength of target fluctuation, but also couple  
286 fluctuations between these targets (Figure 3I). Dynamic analysis of the model's  
287 behavior around steady state with different molecular environments predicted that the  
288 free  $T_1$  ( $T_1^F$ ) and  $T_2$  ( $T_2^F$ ) are positively correlated (Figure 3J), while the competitor  
289 complexes ( $T_1^C$  and  $T_2^C$ ) are negatively correlated (Figure 3K). The correlation  
290 strengths in both cases are maximized in the “ $R$  near-equimolar” regime, and gradually  
291 decrease with the system away from the regime.

292 This phenomenon has been predicted as the “correlation resonance” by some  
293 previous theoretical analysis on gene translation (Mather et al., 2013) and protein  
294 degradation (Cookson et al., 2011; Mather et al., 2010). Two kinds of proteins ( $T_1^F$  and  
295  $T_2^F$ ) competing for degradation enzyme ClpXP ( $R$ ) showed positive correlated  
296 fluctuation, which reached the maximum when the sum of two protein production rates  
297 approached to the ClpXP's processing capacity (Cookson et al., 2011; Mather et al.,  
298 2010). Another theoretical analysis showed that in translation process, fluctuations of  
299 mRNA-ribosome complexes ( $T_1^C$  and  $T_2^C$ ) were negatively correlated (Mather et al.,  
300 2013). In summary, competition can introduce negatively correlated fluctuation  
301 between free targets and positively correlated fluctuation between complexes, and both  
302 of their strength reach the maximum in the “ $R$  near-equimolar” regime.

303

304 **Regulator allocation to multiple targets**

305 Regulators often bind more than two target species simultaneously. How will regulator  
306 be allocated to multiple target species? A system with multiple targets competing for  
307 the same regulator can be described by the set of allocation equations (Figure 4A),  
308 where the proportion of the regulator occupied by a certain target in steady state is  
309 mainly determined by this target's abundance and its capabilities to bind to (and hence  
310 to consume) the regulator (SI Material and Methods). It was noticed that, the form of  
311 the regulator allocation equation is analogous to Kirchhoff's laws in current divider  
312 circuits, where  $R$ 's production rate is analogous to the total current, the capability of  $T_i^C$   
313 to consume  $R$  is analogous to the  $i$ th branch current, and the capability of  $T_i^F$  to occupy  
314  $R$  is analogous to the  $i$ th branch conductance (the reciprocal of resistance) (Figure 4B).  
315 Therefore, electronic circuits and biological systems with competition may exhibit  
316 similar properties, such as the "negative linear dependence" behavior when resources  
317 are insufficient (in the " $R$  scarce" regime) (Carbonell-Ballester et al., 2016).

318       Such allocation equations have displayed in diverse mathematical models, such as  
319 the reaction rates of product formation in enzymatic reactions when multiple substrates  
320 competing for the same catalytic enzyme under the Michaelis-Menten kinetics (Chou  
321 & Talaly, 1977), and the probabilities of promoter-TF binding when multiple promoters  
322 competing for the same TF under the thermodynamic model ( Bintu et al., 2005).  
323 Meanwhile, this property has helped quantify the allocations of the transcription or the  
324 translation resources for synthetic gene circuits (Carbonell-Ballester et al., 2016; Qian  
325 et al., 2017). We also applied such property to predict the miRNA occupancy on each



326 target site in a specific cell type with the miRNA and the target RNA expression levels,  
327 and significantly improved the accuracy of the miRNA target prediction (Xie et al.,  
328 2014). Those miRNAs with significant occupancy changes during tumorigenesis could  
329 serve as potent biomarkers in addition to differentially expressed miRNAs.

330

### 331 **Discussion**

332 Competition for limited resources is ubiquitous throughout diverse molecular reactions  
333 in both natural and synthetic biological systems. Using a coarse-grained mathematical  
334 model, we systematically analyzed the steady-state behavior and the dynamic  
335 properties of various competition network motifs, from the view of indirect regulations  
336 among the competitors as well as the effects of the competitors on the regulator-target  
337 response (Table 1). It should be noticed that, most of the mentioned properties are  
338 connected with the concept of the *regimes* determined by the regulator-target relative  
339 abundance (Figure 2A-C): threshold behavior occurs when system transfers from the  
340 “*R* abundant” to the “*R* near-equimolar” regime, and linear negative dependence  
341 happens when system is in the “*R* scarce” regime; while the sensitivity of the dose-  
342 response curve, the correlated fluctuation, and the noise of the target level are all  
343 maximized in the “*R* near-equimolar” regime.

344 Competition motif is a common network component. It seldom functions as an  
345 isolated module in real-world biological systems, but often interacts with other  
346 components to form complex networks. For example, simulation analysis on ceRNA

347 regulation suggested that additional targets and regulators connected with different  
348 topology could enhance or weaken the ceRNA effect (Ala et al., 2013). Theoretical  
349 analysis predicted that competition for degradation enzyme could either promote or  
350 suppress the robustness of biological oscillating circuit with different topological  
351 structures (Rondelez, 2012). In addition, competition motif could perform a variety of  
352 functions by combining with other network motifs. For example, cooperating with the  
353 positive feedback motif, competition can generate the winner-take-all (WTA) behavior  
354 (Kim et al., 2004), which have been applied to design *in vitro* molecular circuits for  
355 supervised learning and pattern classification using DNA strand displacement (Genot  
356 et al., 2013; Lakin & Stefanovic, 2016).

357 The unified competition model gives inspirations for transferring knowledge  
358 among different molecular scenarios, since similar molecular network topology may  
359 perform similar functions. For example, the case that ceRNA competition can sharpen  
360 the dose-response curve of miRNA regulation (Yuan et al., 2015) is quite similar to that  
361 observed for TF titration effect (Brewster et al., 2014). Such generality and feasibility  
362 give us confidence to make new predictions based on the competition model. For  
363 instance, the properties of pH buffer solutions demonstrated that some weak  
364 competitors could desensitize the response of the primary target to the regulator, which  
365 implies the potential role of many competitors as noise buffer. Functions of numerous  
366 miRNA target sites have long been a mystery that each miRNA species in mammalian  
367 cell could bind to hundreds target RNA species, but only a small portion of the targets

368 with multiple high affinity binding sites could be moderately repressed (rarely exceeds  
369 2-folds). That is to say, in most cases, miRNA binding are not functioned as intensive  
370 repression (Seitz, 2009). Why are there so many evolutionary conserved miRNAs and  
371 potential targets if this is an inefficient regulatory mechanism? The competition model  
372 provides a possible explanation that such widespread miRNA competitors with low  
373 binding affinity could buffer noise and stabilize gene expression.

374 Competition effect is one of the major challenges for circuits design in synthetic  
375 biology. Synthetic gene expression can lead to intracellular resource reallocation, which  
376 may affect the performance of both exogenous gene circuits and host gene networks  
377 simultaneously. It may change the network structure of the original designed circuits  
378 by introducing a hidden layer of regulation, making it difficult to predict the whole  
379 circuit's behavior based on the characteristic of each individual component. For  
380 example, competition for cellular resources may reshape the response of genetic  
381 activation cascades in *E. coli* (Qian et al., 2017), and multiple downstream genes  
382 competing for upstream signal molecules may accentuate the “retroactivity” (Brophy  
383 & Voigt, 2014). It has been found that the induction strength of the synthetic gene  
384 oscillator could influence the growth rate of host cell, the expression of endogenous  
385 genes, and the performance of the oscillator, such as amplification and period (Weisse  
386 et al., 2015). On the other hand, interestingly, using competition effect properly to  
387 rebalance synthetic circuits' relation to the host cell is emerging as an effective way to  
388 refine circuits performance. For example, the robustness of the synthetic oscillator can

389 be greatly improved by introducing competing binding sites for TF LacI to sharpen  
390 target gene dose response curves and suppress gene expression noise (Potvin-Trottier  
391 et al., 2016). Models incorporating circuit-host competition effects can predict synthetic  
392 gene behaviors better (Liao et al., 2017). Reallocating the cellular translational  
393 resources by introducing the endoribonuclease MazF circuit can significantly enhance  
394 exogenous enzyme expression to promote metabolite production (Venturelli et al.,  
395 2017). Utilizing synthetic miRNA and its competitive binding RNA sponges, a RNA-  
396 based AND gate circuit was designed for selectively triggering T cell-mediated killing  
397 of cancer cells (Nissim et al., 2017).

398 As discussed in this paper, competition of molecules matters in diverse biological  
399 processes, not only convoluting regulations in cell, but also introducing plentiful  
400 functions. The concept of competition motifs and its coarse-gained model may provide  
401 a unified insight to understand diverse molecular competition phenomena, and  
402 modulate biological networks by coupling or decoupling components on the hidden  
403 layer.

404

## 405 **Materials and Methods**

406 Detailed information about mathematical derivations and simulations is available in SI  
407 Materials and Methods. Parameters for simulations are shown in Table S1.

408

## 409 **Acknowledgements**

410 This work has been supported by the National Science Foundation of China Grants (No. 61773230,  
411 31371341, 61721003, 91730301, 31671384, 91729301), National Basic Research Program of China  
412 (2017YFA0505503), Initiative Scientific Research Program (No. 20141081175) and Cross-  
413 discipline Foundation of Tsinghua University, and the Open Research Fund of State Key Laboratory  
414 of Bioelectronics Southeast University.

415

## 416 **Conflict of Interests**

417 The authors declare that they have no conflict of interest.

418

## 419 **References**

- 420 Ala, U., Karreth, F. A., Bosia, C., Pagnani, A., Taulli, R., Leopold, V., Tay, Y., Provero, P., Zecchina, R.,  
421 & Pandolfi, P. P. (2013). Integrated transcriptional and competitive endogenous RNA  
422 networks are cross-regulated in permissive molecular environments. *Proc Natl Acad Sci U S*  
423 *A*, *110*(18), 7154-7159. doi:10.1073/pnas.1222509110
- 424 Bintu, L., Buchler, N. E., Garcia, H. G., Gerland, U., Hwa, T., Kondev, J., & Phillips, R. (2005).  
425 Transcriptional regulation by the numbers: models. *Curr Opin Genet Dev*, *15*(2), 116-124.  
426 doi:10.1016/j.gde.2005.02.007
- 427 Blake, W. J., M, K. A., Cantor, C. R., & Collins, J. J. (2003). Noise in eukaryotic gene expression.  
428 *Nature*, *422*(6932), 633-637. doi:10.1038/nature01546
- 429 Bolnick, D. I. (2004). Can Intraspecific Competition Drive Disruptive Selection? An Experimental Test  
430 in Natural Populations of Sticklebacks. *Evolution*, *58*(3). doi:10.1554/03-326
- 431 Bosia, C., Sgro, F., Conti, L., Baldassi, C., Brusa, D., Cavallo, F., Cunto, F. D., Turco, E., Pagnani, A.,  
432 & Zecchina, R. (2017). RNAs competing for microRNAs mutually influence their fluctuations  
433 in a highly non-linear microRNA-dependent manner in single cells. *Genome Biol*, *18*(1), 37.  
434 doi:10.1186/s13059-017-1162-x
- 435 Brewster, R. C., Weinert, F. M., Garcia, H. G., Song, D., Rydenfelt, M., & Phillips, R. (2014). The  
436 transcription factor titration effect dictates level of gene expression. *Cell*, *156*(6), 1312-1323.  
437 doi:10.1016/j.cell.2014.02.022
- 438 Brophy, J. A., & Voigt, C. A. (2014). Principles of genetic circuit design. *Nat Methods*, *11*(5), 508-520.  
439 doi:10.1038/nmeth.2926
- 440 Buchler, N. E., & Louis, M. (2008). Molecular titration and ultrasensitivity in regulatory networks. *J*  
441 *Mol Biol*, *384*(5), 1106-1119. doi:10.1016/j.jmb.2008.09.079
- 442 Burger, A., Walczak, A. M., & Wolynes, P. G. (2010). Abduction and asylum in the lives of  
443 transcription factors. *Proc Natl Acad Sci U S A*, *107*(9), 4016-4021.  
444 doi:10.1073/pnas.0915138107
- 445 Carbonell-Ballester, M., Garcia-Ramallo, E., Montanez, R., Rodriguez-Caso, C., & Macia, J. (2016).  
446 Dealing with the genetic load in bacterial synthetic biology circuits: convergences with the  
447 Ohm's law. *Nucleic Acids Res*, *44*(1), 496-507. doi:10.1093/nar/gkv1280

- 448 Cardinale, S., & Arkin, A. P. (2012). Contextualizing context for synthetic biology--identifying causes  
449 of failure of synthetic biological systems. *Biotechnol J*, *7*(7), 856-866.  
450 doi:10.1002/biot.201200085
- 451 Cesana, M., Cacchiarelli, D., Legnini, I., Santini, T., Sthandier, O., Chinappi, M., Tramontano, A., &  
452 Bozzoni, I. (2011). A long noncoding RNA controls muscle differentiation by functioning as a  
453 competing endogenous RNA. *Cell*, *147*(2), 358-369. doi:10.1016/j.cell.2011.09.028
- 454 Chang, C. H., Qiu, J., O'Sullivan, D., Buck, M. D., Noguchi, T., Curtis, J. D., Chen, Q., Gindin, M.,  
455 Gubin, M. M., van der Windt, G. J., Tonc, E., Schreiber, R. D., Pearce, E. J., & Pearce, E. L.  
456 (2015). Metabolic Competition in the Tumor Microenvironment Is a Driver of Cancer  
457 Progression. *Cell*, *162*(6), 1229-1241. doi:10.1016/j.cell.2015.08.016
- 458 Chen, M., Wang, L., Liu, C. C., & Nie, Q. (2013). Noise attenuation in the ON and OFF states of  
459 biological switches. *ACS Synth Biol*, *2*(10), 587-593. doi:10.1021/sb400044g
- 460 Chou, T.-C., & Talaly, P. (1977). A simple generalized equation for the analysis of multiple inhibitions  
461 of Michaelis-Menten kinetic systems. *Journal of Biological Chemistry*, *252*(18), 6438-6442.
- 462 Connell, J. H. (1983). On the Prevalence and Relative Importance of Interspecific Competition:  
463 Evidence from Field Experiments. *The American Naturalist*, *122*(5), 661-696.  
464 doi:10.1086/284165
- 465 Cookson, N. A., Mather, W. H., Danino, T., Mondragon-Palomino, O., Williams, R. J., Tsimring, L. S.,  
466 & Hasty, J. (2011). Queueing up for enzymatic processing: correlated signaling through  
467 coupled degradation. *Mol Syst Biol*, *7*, 561. doi:10.1038/msb.2011.94
- 468 Genot, A. J., Fujii, T., & Rondelez, Y. (2013). Scaling down DNA circuits with competitive neural  
469 networks. *J R Soc Interface*, *10*(85), 20130212. doi:10.1098/rsif.2013.0212
- 470 Gorochowski, T. E., Avciilar-Kucukgoze, I., Bovenberg, R. A., Roubos, J. A., & Ignatova, Z. (2016). A  
471 Minimal Model of Ribosome Allocation Dynamics Captures Trade-offs in Expression between  
472 Endogenous and Synthetic Genes. *ACS Synth Biol*, *5*(7), 710-720.  
473 doi:10.1021/acssynbio.6b00040
- 474 Gyorgy, A., Jimenez, J. I., Yazbek, J., Huang, H. H., Chung, H., Weiss, R., & Del Vecchio, D. (2015).  
475 Isocost Lines Describe the Cellular Economy of Genetic Circuits. *Biophys J*, *109*(3), 639-646.  
476 doi:10.1016/j.bpj.2015.06.034
- 477 Hardin, G. (1960). The Competitive Exclusion Principle. *Science*, *131*(3409), 1292-1297.  
478 doi:10.1126/science.131.3409.1292
- 479 Hui, S., Silverman, J. M., Chen, S. S., Erickson, D. W., Basan, M., Wang, J., Hwa, T., & Williamson, J.  
480 R. (2015). Quantitative proteomic analysis reveals a simple strategy of global resource  
481 allocation in bacteria. *Mol Syst Biol*, *11*(1), 784. doi:10.15252/msb.20145697
- 482 Jayanthi, S., Nilgiriwala, K. S., & Del Vecchio, D. (2013). Retroactivity controls the temporal  
483 dynamics of gene transcription. *ACS Synth Biol*, *2*(8), 431-441. doi:10.1021/sb300098w
- 484 Jens, M., & Rajewsky, N. (2015). Competition between target sites of regulators shapes post-  
485 transcriptional gene regulation. *Nat Rev Genet*, *16*(2), 113-126. doi:10.1038/nrg3853
- 486 Jiang, P., Ventura, A. C., Sontag, E. D., Merajver, S. D., Ninfa, A. J., & Del Vecchio, D. (2011). Load-  
487 induced modulation of signal transduction networks. *Sci Signal*, *4*(194), ra67.  
488 doi:10.1126/scisignal.2002152

- 489 Johnston, L. A. (2009). Competitive interactions between cells: death, growth, and geography. *Science*,  
490 324(5935), 1679-1682. doi:10.1126/science.1163862
- 491 Khare, A., & Shaulsky, G. (2006). First among equals: competition between genetically identical cells.  
492 *Nat Rev Genet*, 7(7), 577-583. doi:10.1038/nrg1875
- 493 Kim, J., Hopfield, J., & Winfree, E. (2004). *Neural Network Computation by In Vitro Transcriptional*  
494 *Circuits*. Paper presented at the Advances in Neural Information Processing Systems.
- 495 Laird, A. K. (1964). Dynamics of Tumor Growth. *British Journal of Cancer*, 18(3), 490-502.  
496 doi:10.1038/bjc.1964.55
- 497 Lakin, M. R., & Stefanovic, D. (2016). Supervised Learning in Adaptive DNA Strand Displacement  
498 Networks. *ACS Synth Biol*, 5(8), 885-897. doi:10.1021/acssynbio.6b00009
- 499 Lee, T. H., & Maheshri, N. (2012). A regulatory role for repeated decoy transcription factor binding  
500 sites in target gene expression. *Mol Syst Biol*, 8, 576. doi:10.1038/msb.2012.7
- 501 Liao, C., Blanchard, A. E., & Lu, T. (2017). An integrative circuit-host modelling framework for  
502 predicting synthetic gene network behaviours. *Nat Microbiol*, 2(12), 1658-1666.  
503 doi:10.1038/s41564-017-0022-5
- 504 Mather, W. H., Cookson, N. A., Hasty, J., Tsimring, L. S., & Williams, R. J. (2010). Correlation  
505 resonance generated by coupled enzymatic processing. *Biophys J*, 99(10), 3172-3181.  
506 doi:10.1016/j.bpj.2010.09.057
- 507 Mather, W. H., Hasty, J., Tsimring, L. S., & Williams, R. J. (2013). Translational cross talk in gene  
508 networks. *Biophys J*, 104(11), 2564-2572. doi:10.1016/j.bpj.2013.04.049
- 509 Mishra, D., Rivera, P. M., Lin, A., Del Vecchio, D., & Weiss, R. (2014). A load driver device for  
510 engineering modularity in biological networks. *Nat Biotechnol*, 32(12), 1268-1275.  
511 doi:10.1038/nbt.3044
- 512 Nissim, L., Wu, M. R., Pery, E., Binder-Nissim, A., Suzuki, H. I., Stupp, D., Wehrspaun, C., Tabach, Y.,  
513 Sharp, P. A., & Lu, T. K. (2017). Synthetic RNA-Based Immunomodulatory Gene Circuits for  
514 Cancer Immunotherapy. *Cell*, 171(5), 1138-1150 e1115. doi:10.1016/j.cell.2017.09.049
- 515 Potvin-Trottier, L., Lord, N. D., Vinnicombe, G., & Paulsson, J. (2016). Synchronous long-term  
516 oscillations in a synthetic gene circuit. *Nature*, 538(7626), 514-517. doi:10.1038/nature19841
- 517 Qian, Y., Huang, H. H., Jimenez, J. I., & Del Vecchio, D. (2017). Resource Competition Shapes the  
518 Response of Genetic Circuits. *ACS Synth Biol*, 6(7), 1263-1272.  
519 doi:10.1021/acssynbio.6b00361
- 520 Rondelez, Y. (2012). Competition for catalytic resources alters biological network dynamics. *Phys Rev*  
521 *Lett*, 108(1), 018102. doi:10.1103/PhysRevLett.108.018102
- 522 Saha, S., Weber, C. A., Nusch, M., Adame-Arana, O., Hoegge, C., Hein, M. Y., Osborne-Nishimura, E.,  
523 Mahamid, J., Janel, M., Jawerth, L., Pozniakovski, A., Eckmann, C. R., Julicher, F., &  
524 Hyman, A. A. (2016). Polar Positioning of Phase-Separated Liquid Compartments in Cells  
525 Regulated by an mRNA Competition Mechanism. *Cell*, 166(6), 1572-1584 e1516.  
526 doi:10.1016/j.cell.2016.08.006
- 527 Schmiedel, J. M., Klemm, S. L., Zheng, Y., Sahay, A., Bluthgen, N., Marks, D. S., & van Oudenaarden,  
528 A. (2015). Gene expression. MicroRNA control of protein expression noise. *Science*,  
529 348(6230), 128-132. doi:10.1126/science.aaa1738

- 530 Schoener, T. W. (1983). Field Experiments on Interspecific Competition. *The American Naturalist*,  
531 122(2), 240-285. doi:10.1086/284133
- 532 Schrödinger, E. (1944). *What is life?* : Cambridge University Press.
- 533 Scott, M., Gunderson, C. W., Mateescu, E. M., Zhang, Z., & Hwa, T. (2010). Interdependence of cell  
534 growth and gene expression: origins and consequences. *Science*, 330(6007), 1099-1102.  
535 doi:10.1126/science.1192588
- 536 Seitz, H. (2009). Redefining microRNA targets. *Curr Biol*, 19(10), 870-873.  
537 doi:10.1016/j.cub.2009.03.059
- 538 Sigova, A. A., Abraham, B. J., Ji, X., Molinie, B., Hannett, N. M., Guo, Y. E., Jangi, M., Giallourakis,  
539 C. C., Sharp, P. A., & Young, R. A. (2015). Transcription factor trapping by RNA in gene  
540 regulatory elements. *Science*, 350(6263), 978-981. doi:10.1126/science.aad3346
- 541 Sumazin, P., Yang, X., Chiu, H. S., Chung, W. J., Iyer, A., Llobet-Navas, D., Rajbhandari, P., Bansal,  
542 M., Guarnieri, P., Silva, J., & Califano, A. (2011). An extensive microRNA-mediated network  
543 of RNA-RNA interactions regulates established oncogenic pathways in glioblastoma. *Cell*,  
544 147(2), 370-381. doi:10.1016/j.cell.2011.09.041
- 545 Svanback, R., & Bolnick, D. I. (2007). Intraspecific competition drives increased resource use diversity  
546 within a natural population. *Proc Biol Sci*, 274(1611), 839-844. doi:10.1098/rspb.2006.0198
- 547 Venturelli, O. S., Tei, M., Bauer, S., Chan, L. J. G., Petzold, C. J., & Arkin, A. P. (2017). Programming  
548 mRNA decay to modulate synthetic circuit resource allocation. *Nat Commun*, 8, 15128.  
549 doi:10.1038/ncomms15128
- 550 Weisse, A. Y., Oyarzun, D. A., Danos, V., & Swain, P. S. (2015). Mechanistic links between cellular  
551 trade-offs, gene expression, and growth. *Proc Natl Acad Sci U S A*, 112(9), E1038-1047.  
552 doi:10.1073/pnas.1416533112
- 553 Wu, G., Yan, Q., Jones, J. A., Tang, Y. J., Fong, S. S., & Koffas, M. A. G. (2016). Metabolic Burden:  
554 Cornerstones in Synthetic Biology and Metabolic Engineering Applications. *Trends*  
555 *Biotechnol*, 34(8), 652-664. doi:10.1016/j.tibtech.2016.02.010
- 556 Xie, P., Liu, Y., Li, Y., Zhang, M. Q., & Wang, X. (2014). MIROR: a method for cell-type specific  
557 microRNA occupancy rate prediction. *Mol Biosyst*, 10(6), 1377-1384.  
558 doi:10.1039/c3mb70610a
- 559 Yuan, Y., Liu, B., Xie, P., Zhang, M. Q., Li, Y., Xie, Z., & Wang, X. (2015). Model-guided quantitative  
560 analysis of microRNA-mediated regulation on competing endogenous RNAs using a synthetic  
561 gene circuit. *Proc Natl Acad Sci U S A*, 112(10), 3158-3163. doi:10.1073/pnas.1413896112
- 562 Yuan, Y., Ren, X., Xie, Z., & Wang, X. (2016). A quantitative understanding of microRNA-mediated  
563 competing endogenous RNA regulation. *Quantitative Biology*, 4(1), 47-57.  
564 doi:10.1007/s40484-016-0062-5
- 565 Zheng, Q., Bao, C., Guo, W., Li, S., Chen, J., Chen, B., Luo, Y., Lyu, D., Li, Y., Shi, G., Liang, L., Gu,  
566 J., He, X., & Huang, S. (2016). Circular RNA profiling reveals an abundant circHIPK3 that  
567 regulates cell growth by sponging multiple miRNAs. *Nat Commun*, 7, 11215.  
568 doi:10.1038/ncomms11215
- 569 Zwietering, M., Jongenburger, I., Rombouts, F., & Van't Riet, K. (1990). Modeling of the bacterial  
570 growth curve. *Applied and environmental microbiology*, 56(6), 1875-1881.

571



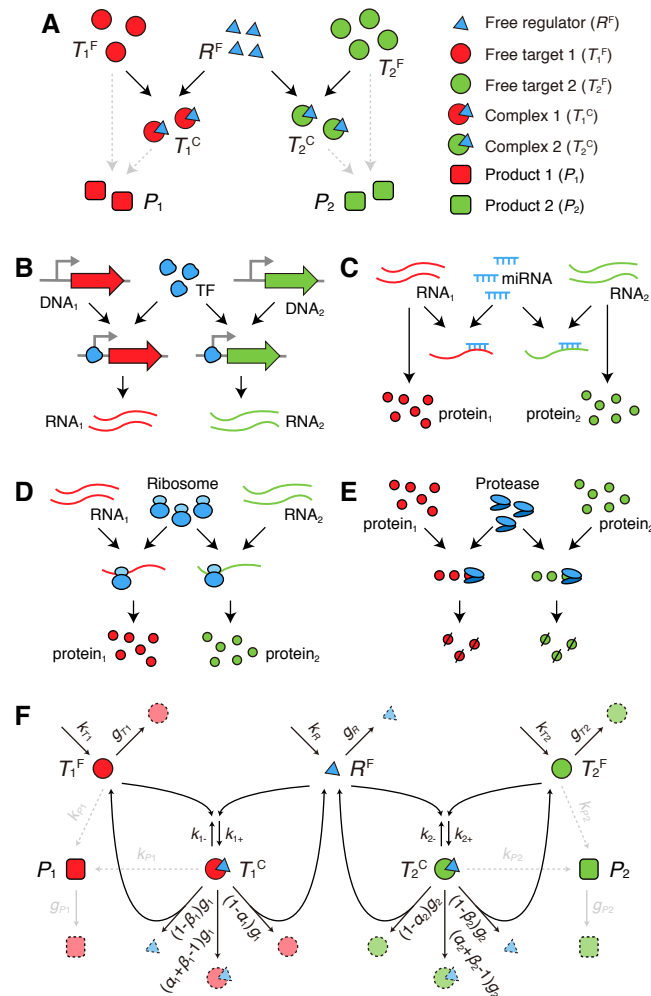

**Figure 1** The coarse-gained competition motif model.

(A) Basic structure of the competition motif. Downstream products can be produced from either free targets or complexes.

(B-E) Competition motifs abstracted from diverse competition scenarios: (B) DNA binding sites competing for TFs; (C) RNA molecules competing for miRNAs; (D) mRNA molecules competing for ribosomes; (E) proteins competing for proteases.

(F) Unified kinetic model of the competition motif.

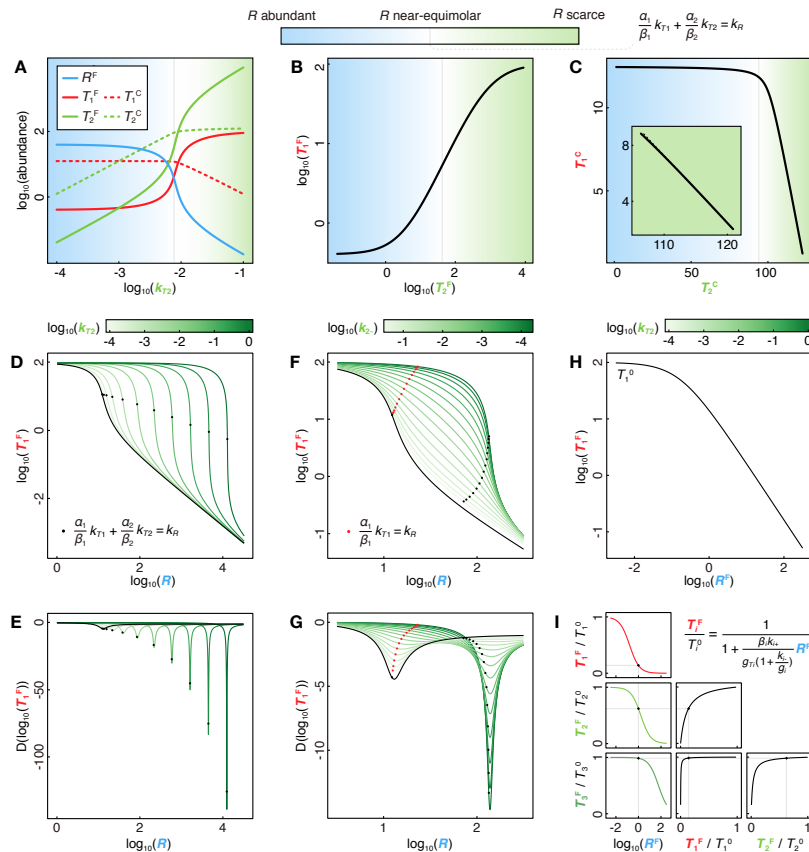

**Figure 2** Steady state behaviors of competition systems.

(A-C) Regimes of competition systems. (A) Abundances changes of each component with the increment of  $T_2$ 's production rate ( $k_{T2}$ ). (B) Abundance of  $T_1^F$  as a function of that of  $T_2^F$ . (C) Abundance of  $T_1^C$  as a function of that of  $T_2^C$ . Blue, white and green areas represent “ $R$  abundant”, “ $R$  near-equimolar” and “ $R$  scarce” regime respectively. Grey lines represent the approximate threshold (SI Materials and Methods).

(D-G) Dose-response curves modulated by competition. (D-E)  $R$ - $T_1^F$  dose-response curves (D) and their derivatives (E) with different  $T_2$ 's production rate ( $k_{T2}$ ). (F-G)  $R$ - $T_1^F$  dose-response curves (F) and their derivatives (G) with different  $T_2^C$ 's dissociation rate ( $k_2$ ).  $R$  represents the total abundance of regulator ( $R^F + T_1^C + T_2^C$ ). Black lines represent the dose response curve without  $T_2$  ( $k_{T2}=0$ ).

(H)  $R^F$ - $T_1$  dose-response curves with different  $k_{T2}$ .  $T_1^0$  represents the abundance of  $T_1^F$  without  $R$ . Black line represents the dose response curve without  $T_2$  ( $k_{T2}=0$ ). All the curves with different  $k_{T2}$  are exactly overlapped.

(I) Repression folds of all targets are determined by the same  $R^F$  abundance in a multi-target repression system.

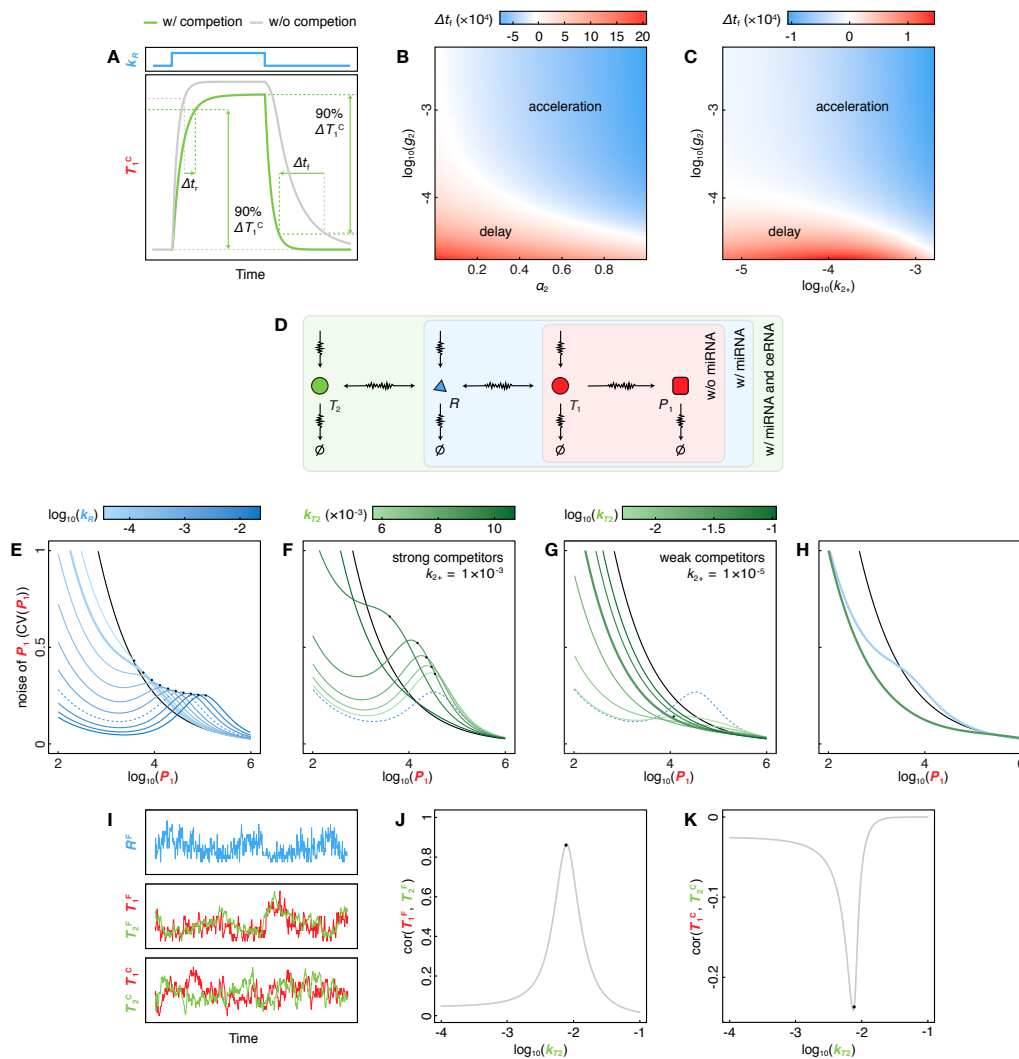

**Figure 3** Dynamic properties of competition systems.

(A) Quantitative measurements of response time.  $\Delta t_r$  and  $\Delta t_f$  represent the alteration of response time on the rising and falling edge of  $R$ 's change respectively. Here response time is defined as the time taken by  $T_1^C$  level to change from 0% to 90% between its initial and final steady states.

(B-C) Heatmaps of  $\Delta t_f$  under different  $\alpha_2$  and  $g_2$  (B), or  $k_{2+}$  and  $g_2$  (C).

(D) Schematic diagram of the target expression noise in the miRNA-target competition scenario.

(E-H) Modification of target expression noise by competition. (E) Product expression noise ( $CV(P_1)$ ) with different  $R$ 's production rates ( $k_R$ ). (F)  $CV(P_1)$  with different  $T_2$ 's production rates ( $k_{T_2}$ ) where  $T_2$  acts as a strong competitor. (G)  $CV(P_1)$  with different  $k_{T_2}$  where  $T_2$  acts as a weak competitor. (H) Comparison of  $CV(P_1)$  with or without

competition. Here miRNA-RNA competing system is taken as an example. Black lines represent system without  $R$ . Dashed blue lines are highlighted as the basal lines in (F) and (G). The thick blue and green lines in (H) are taken from (E) and (G) respectively. Black dots represent the approximate threshold (there are no black dots on some curves because  $k_{T_2}$  is too large to form the threshold).

(I-K) Correlated fluctuations introduced by competition. (I) Stochastic simulations of each component's abundance in competition motif. (J-K) Correlations of  $T_1^F$  and  $T_2^F$  (J), or  $T_1^C$  and  $T_2^C$  (K) changing with  $T_2$ 's production rate ( $k_{T_2}$ ). Black dots represent the approximate threshold.

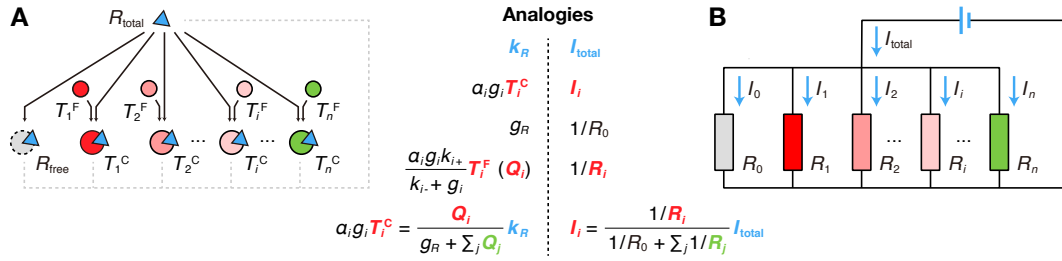

**Figure 4** Regulator allocation for multi-target competition.

(A) Regulator allocation equations and schematic graph representation.  $R_{total}$  represent the total abundance of regulator, including free regulator and regulator in complexes.

(B) Kirchhoff's laws in current divider circuits.

**Table 1** Properties of regulation by competition

|                              | <b>Regulation between targets</b>                                        | <b>Influences on regulator-target response</b> |
|------------------------------|--------------------------------------------------------------------------|------------------------------------------------|
| <b>Steady-state behavior</b> | Threshold behavior<br>Negative linear dependence<br>Regulator allocation | Shaping dose-response curves                   |
| <b>Dynamic responses</b>     | Correlated fluctuation                                                   | Response time modulation<br>Noise modification |

# SI Materials and Methods

## 1. A unified coarse-gained competition motif model.

Parameters involved in the competition motif model (Figure 1F) where two target molecule species (target#1 and #2,  $T_1$  and  $T_2$ ) competitively bind with a shared regulatory molecule species (regulator,  $R$ ) are described as follows. In general,  $T_1$ ,  $T_2$  or  $R$  is produced with a rate of  $k_{T1}$ ,  $k_{T2}$  or  $k_R$ , respectively. Free  $T_1$  ( $T_1^F$ ),  $T_2$  ( $T_2^F$ ) or  $R$  ( $R^F$ ) degrades at a rate of  $g_{T1}$ ,  $g_{T2}$  or  $g_R$ .  $T_1^F$  or  $T_2^F$  binds to  $R^F$  to form target-regulator complex  $T_1^C$  or  $T_2^C$  at a rate of  $k_{1+}$  or  $k_{2+}$ , and  $T_1^C$  or  $T_2^C$  dissociates into  $R^F$  and  $T_1^F$  or  $T_2^F$  at a rate of  $k_{1-}$  or  $k_{2-}$ .  $T_1^C$  or  $T_2^C$  degrades at a rate of  $g_1$  or  $g_2$ . Regulators on the complex degrade with the possibility of  $\alpha_1$  or  $\alpha_2$ , and targets on the complex degrade with the possibility of  $\beta_1$  or  $\beta_2$ , thus regulator would recycle from  $T_1^C$  or  $T_2^C$  with the possibility of  $1 - \alpha_1$  or  $1 - \alpha_2$ , target would recycle from  $T_1^C$  or  $T_2^C$  with the possibility of  $1 - \beta_1$  or  $1 - \beta_2$ , and regulator and target would degrade together with the possibility of  $\alpha_1 + \beta_1 - 1$  or  $\alpha_2 + \beta_2 - 1$ . When  $R$  is a repressor,  $T_1^F$  or  $T_2^F$  may generate production  $P_1$  or  $P_2$  at a rate of  $k_{P1}$  or  $k_{P2}$ . In contrast, when  $R$  is an activator,  $T_1^C$  or  $T_2^C$  may generate production  $P_1$  or  $P_2$  at a rate of  $k_{P1}$  or  $k_{P2}$ .  $P_1$  or  $P_2$  degrades at a rate of  $g_{P1}$  or  $g_{P2}$ .

The competing model is described in the following differential equations:

$$\frac{dR^F}{dt} = k_R - g_R R^F - (k_{1+} T_1^F + k_{2+} T_2^F) R^F + k_{1-} T_1^C + k_{2-} T_2^C + (1 - \alpha_1) g_1 T_1^C + (1 - \alpha_2) g_2 T_2^C \quad [1]$$

$$\frac{dT_1^F}{dt} = k_{T1} - g_{T1} T_1^F - k_{1+} T_1^F R^F + k_{1-} T_1^C + (1 - \beta_1) g_1 T_1^C \quad [2]$$

$$\frac{dT_1^C}{dt} = k_{1+} T_1^F R^F - k_{1-} T_1^C - g_1 T_1^C \quad [3]$$

$$\frac{dT_2^F}{dt} = k_{T2} - g_{T2} T_2^F - k_{2+} T_2^F R^F + k_{2-} T_2^C + (1 - \beta_2) g_2 T_2^C \quad [4]$$

$$\frac{dT_2^C}{dt} = k_{2+} T_2^F R^F - k_{2-} T_2^C - g_2 T_2^C \quad [5]$$

We used this model to describe competitions in various biological processes. In the competition for TF by DNA binding sites (Figure 1B),  $T_1$  and  $T_2$  represent TF binding sites on DNA and  $R$  represents TF. The production and degradation rates of DNA binding sites are set to zero because they are negligible. Complexes degrade with only TF loss ( $\alpha \sim 1$ ,  $\beta \sim 0$ ). When  $g_1$  or  $g_2$  are set to zero, there is no TF loss. For TF as activator, DNA-TF complexes ( $T_1^C$  and  $T_2^C$ ) can be transcribed into RNA, while for TF as repressor, free DNAs ( $T_1^F$  and  $T_2^F$ ) can be transcribed (Figure S1A). In the competition for miRNA by RNA molecules (Figure 1C),  $T_1$  and  $T_2$  represent

two RNA molecule species and  $R$  represents miRNA. The loss of miRNA is relatively small so  $\beta$  is set to zero (Figure S1B) and as miRNA acts as a repressor, only free RNAs ( $T_1^F$  and  $T_2^F$ ) translate into proteins. In the case of ribosome allocation (Figure 1D), where  $T_1$  and  $T_2$  represent two RNA molecule species and  $R$  represents ribosome,  $\beta$  is also set to zero (Figure S1C). In protein degradation competition (Figure 1E), where  $T_1$  and  $T_2$  represent two protein molecule species and  $R$  represents the protein degradation machine,  $\beta$  is set to zero too (Figure S1D). The topology of miRNA-target competition, ribosome-mRNA competition and protein degradation competition are identical except that components generating further production are different.

## 2. Theoretically analysis for molecular environment determining shapes of the regulation between competitors.

**2.1. Solving steady states.** Eqs. 1-5 can be solved for steady state when giving all differentials as zero. By adding Eqs. 2 and 3, we get

$$T_1^C = \frac{k_{T1} - T_1^F g_{T1}}{\beta_1 g_1} \quad [6]$$

By adding Eqs. 1, 3 and 5, we get

$$R^F = \frac{k_R - \alpha_1 T_1^C g_1 - \alpha_2 T_2^C g_2}{g_R} \quad [7]$$

Combining Eqs. 6 and 7, we get

$$R^F = \frac{k_R - \frac{\alpha_1}{\beta_1} (k_{T1} - T_1^F g_{T1}) - \frac{\alpha_2}{\beta_2} (k_{T2} - T_2^F g_{T2})}{g_R} \quad [8]$$

Substituting Eqs. 6 and 8 into Eq. 3, we get

$$(T_1^F)^2 - T_1^F (T_1^0 - \lambda_1 - \theta_1 + \phi_{21}) - \lambda_1 T_1^0 = 0 \quad [9]$$

Where

$$T_1^0 = \frac{k_{T1}}{g_{T1}} \quad T_2^0 = \frac{k_{T2}}{g_{T2}} \quad [10]$$

$$\lambda_1 = \frac{g_R}{\alpha_1 k_{1+}} \left( \frac{k_{1-}}{g_1} + 1 \right) \quad \lambda_2 = \frac{g_R}{\alpha_2 k_{2+}} \left( \frac{k_{2-}}{g_2} + 1 \right) \quad [11]$$

$$\gamma_1 = \frac{\beta_1}{\alpha_1 g_{T1}} \quad \gamma_2 = \frac{\beta_2}{\alpha_2 g_{T2}} \quad [12]$$

$$\theta_1 = \gamma_1 k_R \quad \theta_2 = \gamma_2 k_R \quad [13]$$

$$\phi_{21} = \frac{\gamma_1}{\gamma_2} (T_2^0 - T_2^F) \quad \phi_{12} = \frac{\gamma_2}{\gamma_1} (T_1^0 - T_1^F) \quad [14]$$



Parameters were lumped to represent certain physical meanings to simplify the result.  $T_i^0$  represents the free level of target  $\#i$  ( $T_i$ ) without regulators.  $1/\lambda_i$  is proportional to  $k_{i+}$ , and negatively correlated with  $k_{i-}$ , thus could reflect the strength of binding affinity between  $T_i$  and regulator.  $\theta$  is proportional to  $k_R$ , thus could reflect the level of regulator.  $\phi_{ji}$  exhibits the competing regulation effects by target  $\#j$  upon to target  $\#i$ .

Eq. 9 is a quadratic equation of  $T_1^F$ . Thus, the steady state abundance of free targets can be expressed as

$$T_1^F = \frac{1}{2}(T_1^0 - \lambda_1 - \theta_1 + \phi_{21} + \sqrt{(T_1^0 - \lambda_1 - \theta_1 + \phi_{21})^2 + 4\lambda_1 T_1^0}) \quad [15]$$

$$T_2^F = \frac{1}{2}(T_2^0 - \lambda_2 - \theta_2 + \phi_{12} + \sqrt{(T_2^0 - \lambda_2 - \theta_2 + \phi_{12})^2 + 4\lambda_2 T_2^0}) \quad [16]$$

**2.2. Explanations on regimes and related phenomena.** Assuming that the binding between targets and regulator is very strong,  $\lambda_i$  becomes negligible, thus Eq. 15 can be simplified as follows:

$$T_1^F \simeq \begin{cases} \frac{\lambda_1 T_1^0}{\theta_1 - T_1^0 - \frac{\gamma_1}{\gamma_2}(T_2^0 - T_2^F)} \simeq 0 & , \text{ if } T_1^0 + \phi_{21} < \theta_1 \\ T_1^0 - \theta_1 + \frac{\gamma_1}{\gamma_2}(T_2^0 - T_2^F) & , \text{ if } T_1^0 + \phi_{21} > \theta_1 \end{cases} \quad [17]$$

Meanwhile, the steady-state abundance of  $T_1^C$  and  $T_2^C$  can be calculated from Eq. 6:

$$T_1^C = \frac{g_{T1}}{\beta_1 g_1}(T_1^0 - T_1^F) \quad T_2^C = \frac{g_{T2}}{\beta_2 g_2}(T_2^0 - T_2^F) \quad [18]$$

and can be simplified using Eq. 17:

$$T_1^C \simeq \begin{cases} \frac{g_{T1}}{g_1 \beta_1} T_1^0 & , \text{ if } T_1^0 + \phi_{21} < \theta_1 \\ \frac{g_{T1}}{g_1 \beta_1} (\theta_1 - \frac{\alpha_2 g_2 \beta_1}{\alpha_1 g_{T1}} T_2^C) & , \text{ if } T_1^0 + \phi_{21} > \theta_1 \end{cases} \quad [19]$$

The turning point in Eqs. 17 and 19:

$$T_1^0 + \phi_{21} = \theta_1 \quad [20]$$

can be regarded as a threshold to distinguish regimes of the system: “ $R$  abundant” ( $T_1^0 + \phi_{21} \ll \theta_1$ ), “ $R$  equimolar” ( $T_1^0 + \phi_{21} \simeq \theta_1$ ) and “ $R$  scarce” ( $T_1^0 + \phi_{21} \gg \theta_1$ ). Eqs. 17 and 19 explain why the relationships between competitors are piecewise (Figure 2A-C). For  $T_1^F$  and  $T_2^F$ , according to Eq. 17, in “ $R$  abundant” regime ( $T_1^0 + \phi_{21} \ll \theta_1$ ), almost all targets bind with  $R$ , so the level of  $T_1^F$  approaches to zero. In the contrary, in “ $R$  scarce” regime ( $T_1^0 + \phi_{21} \gg \theta_1$ ),  $T_1^F$  increases with

the increment of  $T_2^F$ , which is because when the production rate of  $T_2$  raises to sequester  $R$ ,  $T_2^C$  increases thus  $T_2^0 - T_2^F$  increases according to Eq. 18. Given the above, when the production rate of  $T_2$  increases to switch the system from  $R$  “abundant” regime to “ $R$  scarce” regime, the abundance of  $T_1^F$  will exhibit a “threshold behavior” (Figure 2B).

Similarly, Eq. 19 suggested that the relationship between  $T_1^C$  and  $T_2^C$  is piecewise linear. If  $R$  is abundant ( $T_1^0 + \phi_{21} \ll \theta_1$ ),  $T_1^C$  would keep substantially unchanged, while when  $R$  is scarce ( $T_1^0 + \phi_{21} \gg \theta_1$ ),  $T_1^C$  would decrease linearly with the increment of  $T_2^C$ , thus shows “negative linear dependence” (Figure 2C).

**2.3. Approximation of the regime threshold.** The threshold (Eq. 20) can be approximated based on the strong binding assumption. It is equivalent to:

$$\frac{k_{T1}}{g_{T1}} + \frac{\alpha_2 \beta_1 g_{T2}}{\alpha_1 \beta_2 g_{T1}} \left( \frac{k_{T2}}{g_{T2}} - T_2^F \right) = \frac{\beta_1 k_R}{\alpha_1 g_{T1}} \quad [21]$$

From Eq. 3, we get

$$T_1^F = \frac{k_{1-} + g_1}{R^F k_{1+}} T_1^C \quad [22]$$

According to Eq. 17, before the system reaches the threshold ( $T_1^0 + \phi_{21} \leq \theta_1$ ) in the process of increment of production of  $T_2$ ,  $T_1^F$  is much smaller than  $T_1^C$  and approaches to zero, and so does  $T_2^F$ . Thus, the threshold point ( $T_1^0 + \phi_{21} = \theta_1$ ) could be approximated from Eq. 21 as:

$$\frac{\alpha_1}{\beta_1} k_{T1} + \frac{\alpha_2}{\beta_2} k_{T2} = k_R \quad [23]$$

Eq. 23 gives an approximation of the threshold position to estimate the regime of a competing system roughly.

### 3. Competition can shape the regulator-target response curve.

**3.1. How competition shapes regulator-target response curve.** According to Eq. 9, there are

$$F(k_R, T_1^F, T_2^F) = (T_1^F)^2 - T_1^F (T_1^0 - \lambda_1 - \theta_1 + \phi_{21}) - \lambda_1 T_1^0 = 0 \quad [24]$$

$$G(k_R, T_1^F, T_2^F) = (T_2^F)^2 - T_2^F (T_2^0 - \lambda_2 - \theta_2 + \phi_{12}) - \lambda_2 T_2^0 = 0 \quad [25]$$

Thus,

$$\frac{\partial T_1^F}{\partial k_R} = \frac{\begin{vmatrix} \frac{\partial F}{\partial k_R} & \frac{\partial F}{\partial T_2^F} \\ \frac{\partial G}{\partial k_R} & \frac{\partial G}{\partial T_2^F} \end{vmatrix}}{\begin{vmatrix} \frac{\partial F}{\partial T_1^F} & \frac{\partial F}{\partial T_2^F} \\ \frac{\partial G}{\partial T_1^F} & \frac{\partial G}{\partial T_2^F} \end{vmatrix}} = -\frac{\gamma_1}{1 + \frac{\lambda_1 T_1^0}{\lambda_2 T_2^0} \left(\frac{T_2^F}{T_1^F}\right)^2 + \frac{\lambda_1 T_1^0}{(T_1^F)^2}} \quad [26]$$

$$\frac{\partial \log T_1^F}{\partial \log k_R} = \frac{k_R}{T_1^F} \frac{\partial T_1^F}{\partial k_R} = -\frac{\gamma_1 k_R}{T_1^F + \frac{\lambda_1 T_1^0}{\lambda_2 T_2^0} \frac{(T_2^F)^2}{T_1^F} + \frac{\lambda_1 T_1^0}{T_1^F}} \quad [27]$$

Eq. 27 describes the derivative of regulator-target response curve (Figure 2E and 2G).

Similarly, the buffer capacity, which quantifies the ability to resist pH changes in buffer solution, can be calculated as

$$B = -\frac{\partial k_R}{\partial \log T_1^F} = \frac{1}{\gamma_1} \left( T_1^F + \frac{\lambda_1 T_1^0}{\lambda_2 T_2^0} \frac{(T_2^F)^2}{T_1^F} + \frac{\lambda_1 T_1^0}{T_1^F} \right) \quad [28]$$

**3.2. Competition in buffer solution.** For any buffer solution with a weak acid (HA) and its conjugate base ( $A^-$ ) or a weak base (BOH) and its conjugate acid ( $B^+$ ), there are

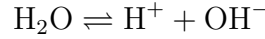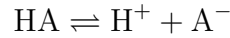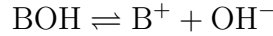

Here we take ammonium buffer solution ( $NH_3 \cdot H_2O$  and  $NH_4Cl$ ) as an example. In a aqueous solution with  $a$  mol/L  $NH_3 \cdot H_2O$  and  $b$  mol/L  $NH_4Cl$ , there are

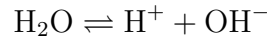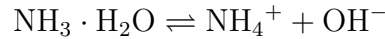

The equilibrium constants of these two reactions are

$$K_1 = \frac{[H^+][OH^-]}{[H_2O]} \quad [29]$$

$$K_2 = \frac{[NH_4^+][OH^-]}{[NH_3 \cdot H_2O]} \quad [30]$$

Because the concentration of water in an aqueous solution is almost invariant, the equilibrium constant of water (ion-product constant) is defined as

$$K_w = [H^+][OH^-] = K_1[H_2O] \simeq 10^{-14} \text{ mol} \cdot \text{L}$$

Here, we consider  $H^+$  ( $T_1$ ) and  $NH_4^+$  ( $T_2$ ) competing for  $OH^-$  ( $R$ ). Thus, Eqs. 29 and 30 is equivalent to

$$K_1 = \frac{T_1^F R^F}{T_1^C} \quad [31]$$

$$K_2 = \frac{T_2^F R^F}{T_2^C} \quad [32]$$

Meanwhile, because there are no production and degradation of any component, every substance is conserved as

$$T_1^F + T_1^C = T_1^A = w \quad [33]$$

$$T_2^F + T_2^C = T_2^A = a + b \quad [34]$$

$$T_1^C + T_2^C + R^F = R^A = a + w \quad [35]$$

Combining Eqs. 33-35, we get

$$R^F = R^A - T_1^A - T_2^A + T_1^F + T_2^F \quad [36]$$

Combining Eqs. 31, 32 and 36, we get

$$T_1^F = \frac{1}{2}(T_1^A + T_2^A - R^A - T_2^F - K_1 + \sqrt{(T_1^A + T_2^A - R^A - T_2^F - K_1)^2 + 4K_1 T_1^0}) \quad [37]$$

which is a degenerate form of Eq. 15, where

$$\begin{aligned} \alpha_1 &= \alpha_2 = \beta_1 = \beta_2 & g_{T1} &= g_{T2} \\ K_1 &= \frac{g_R}{\alpha_1 k_{1+}} \left( \frac{k_{1-}}{g_1} + 1 \right) & K_2 &= \frac{g_R}{\alpha_2 k_{2+}} \left( \frac{k_{2-}}{g_2} + 1 \right) \\ T_1^A &= k_{T1} / g_{T1} & T_2^A &= k_{T2} / g_{T2} \\ R^A &= k_R / g_{T1} = k_R / g_{T2} \end{aligned}$$

According to Eq. 28, the buffer capacity of this solution is

$$B = \frac{\partial R}{\partial pOH} = T_1^F + \frac{K_w}{K_2 T_2^A} \frac{(T_2^F)^2}{T_1^F} + \frac{K_w}{T_1^F} = [OH^-] + \frac{K_2(a+b)[OH^-]}{(K_2 + [OH^-])^2} + [H^+] \quad [38]$$

Eq. 38 indicates that when a mild change of  $OH^-$  is introduced to the solution, the buffer capacity guarantees the stable of pOH (and pH). More buffer substance ( $NH_4^+$  and  $NH_3 \cdot H_2O$ ,  $a + b$ ) can lead to a larger buffer capacity, and the buffer capacity may maximize when  $pH = pK_2$ .

**3.3. Dose-response curve of free target to free regulator.** Substituting Eq. 22 into Eq. 2, we get

$$k_{T_1} - T_1^F g_{T_1} - k_{1+} R^F T_1^F + (k_{1-} + (1 - \beta_1) g_1) T_1^C = 0 \quad [39]$$

Thus,

$$\frac{T_1^F}{T_1^0} = \frac{1}{1 + O_1 R^F}, \text{ where } O_1 = \frac{\beta_1 k_{1+}}{g_{T_1} (1 + \frac{k_{1-}}{g_1})} \quad [40]$$

In system with  $n$  targets competing for same regulator, for the  $i$ th target ( $i = 1, 2, \dots, n$ ), this result can be extended as:

$$\frac{T_i^F}{T_i^0} = \frac{1}{1 + O_i R^F}, \text{ where } O_i = \frac{\beta_i k_{i+}}{g_{T_i} (1 + \frac{k_{i-}}{g_i})} \quad [41]$$

Similarly,

$$\frac{T_i^C}{T_i^0} = \frac{g_{T_i}}{\beta_i g_i} \left(1 - \frac{1}{1 + O_i R^F}\right) \quad [42]$$

Eqs. 41 and 42 indicate that the level of  $T_i^F$  and  $T_i^C$  are determined only by the free level of  $R$ , and some chemical kinetic parameters of  $T_i$  and  $R$ . In another words if two or more targets compete for shared  $R$ , the relative abundances of each free target or complex are independent of other targets when giving the free level of  $R$ . In the siRNA design strategy (Yuan et al., 2015; Yuan et al., 2016), this property guarantees that no matter what expression of the off-target gene is (unless the expression is zero), the amount of free siRNA required to repress the target gene to a certain extent would always repress the off-target gene to a certain extent, which is determined by  $O_{\text{on}}$  and  $O_{\text{off}}$ , as described in Eq. 41. When giving the expression of any target gene, siRNA could act as a medium to predict the expression of other target genes. This property also guides how to select suitable chemical reaction parameters: a good siRNA should have large  $O_{\text{on}}$  and small  $O_{\text{off}}$ .

#### 4. Competition can delay or accelerate dynamic response.

When  $R$  level changes, comparisons of  $\frac{dR^F}{dt}$  tells how competition affects the dynamic response speed of  $T_1$  with respect to  $R$ . According to Eq. 1 and 5,

$$\begin{aligned} \frac{dR^F}{dt} = & k_R - g_R R^F - k_{1+} T_1^F R^F + k_{1-} T_1^C + (1 - \alpha_1) g_1 T_1^C \\ & \underbrace{-k_{2+} T_2^F R^F + k_{2-} T_2^C + g_2 T_2^C}_A \underbrace{-\alpha_2 g_2 T_2^C}_B \end{aligned} \quad [43]$$

Item A equals to  $-\frac{dT_2^C}{dt}$ , and indicates the ability of  $T_2$  to sequester  $R$  when  $T_2^C$  forms ( $-\frac{dT_2^C}{dt} < 0$ ), or release  $R$  when  $T_2^C$  dissociates ( $-\frac{dT_2^C}{dt} > 0$ ). Item B indicates the level of  $R$  loss mediated by  $T_2^C$  degradation.

On the rising edge of  $R$ ,  $T_2^C$  forms so item A  $< 0$ , meanwhile item B  $< 0$  all the time, thus  $\frac{dR^F}{dt}$  is smaller than non-competing system, leading to a slower response. On the falling edge of  $R$ , item A  $> 0$  while item B  $< 0$ , thus the response speed depends on the relative magnitude of item A and B. As  $g_2$  or  $\alpha_2$  increases, the absolute value of item B increases to alter the response from delay to acceleration. As  $k_2^+$  increases or  $k_2^-$  decreases, item A increases while the absolute value of item B also increases because  $T_2^C$  becomes larger, thus delay the response when there is no  $R$  loss mediated by  $T_2^C$  ( $g_2 = 0$ , Figure S3D), alter the response from delay to acceleration when  $g_2$  is moderate (Figure S3E), or accelerate the response when  $g_2$  is large enough (Figure S3F).

## 5. Noise and correlated fluctuation evaluation.

The variances and co-variances of the molecular species in the system can be estimated with linear noise approximation. Fluctuation-dissipation theorem provides a general way to quantifies the fluctuations. The fluctuation-dissipation equation was solved numerically to calculate the covariance matrix  $\mathbf{C}$ , the diagonal elements of which are the variance of corresponding entities, while the off-diagonal elements of which describe the co-variances between molecular species. The noise of a molecular species  $i$  is defined as coefficient of variation  $\sigma(x_i)/\bar{x}_i$  and the correlation between two molecular species  $i$  and  $j$  is defined as  $\text{cov}(x, y)/(\sigma(x_i)\sigma(x_j))$ , where  $x_i$  and  $x_j$  are random variables representing the abundance of molecular species  $i$  and  $j$ .

Taking miRNA competing system as an example (where miRNA acts as repressor), the vector of molecular number

$$\mathbf{N} = \left[ R^F \quad T_1^F \quad T_2^F \quad T_1^C \quad T_2^C \quad P_1 \quad P_2 \right] \quad [44]$$

Transition rates vector is

$$\mathbf{f}(\mathbf{x}) = \left[ \begin{array}{cccccccc} k_{T1} & g_{T1}T_1^F & k_{1+}T_1^F R^F & k_{1-}T_1^C & g_1(1-\beta_1)T_1^C & k_{T2} & g_{T2}T_2^F & \\ k_{2+}T_2^F R^F & k_{2-}T_2^C & g_2(1-\beta_2)T_2^C & k_R & g_R R^F & g_1(1-\alpha_1)T_1^C & & \\ g_1(\alpha_1 + \beta_1 - 1)T_1^C & g_2(1-\alpha_2)T_2^C & g_2(\alpha_2 + \beta_2 - 1)T_2^C & k_{P1}T_1^F & & & & \\ g_{P1}P_1 & k_{P2}T_2^F & g_{P2}P_2 & & & & & \end{array} \right] \quad [45]$$

Stoichiometric matrix is

$$\mathbf{S} = \begin{bmatrix} 1 & -1 & -1 & 1 & 1 & 0 & 0 & 0 & 0 & 0 & 0 & 0 & 0 & 0 & 0 & 0 & 0 & 0 & 0 \\ 0 & 0 & 0 & 0 & 0 & 1 & -1 & -1 & 1 & 1 & 0 & 0 & 0 & 0 & 0 & 0 & 0 & 0 & 0 \\ 0 & 0 & -1 & 1 & 0 & 0 & 0 & -1 & 1 & 0 & 1 & -1 & 1 & 1 & 0 & 0 & 0 & 0 & 0 \\ 0 & 0 & 1 & -1 & -1 & 0 & 0 & 0 & 0 & 0 & 0 & 0 & -1 & 0 & -1 & 0 & 0 & 0 & 0 \\ 0 & 0 & 0 & 0 & 0 & 0 & 0 & 1 & -1 & -1 & 0 & 0 & 0 & -1 & 0 & -1 & 0 & 0 & 0 \\ 0 & 0 & 0 & 0 & 0 & 0 & 0 & 0 & 0 & 0 & 0 & 0 & 0 & 0 & 0 & 0 & 1 & -1 & 0 \\ 0 & 0 & 0 & 0 & 0 & 0 & 0 & 0 & 0 & 0 & 0 & 0 & 0 & 0 & 0 & 0 & 0 & 0 & 1 & -1 \end{bmatrix} \quad [46]$$

In the steady state, the rate equations can be linearized by the Jacobian matrix:

$$\mathbf{J} = \mathbf{S} \cdot \frac{\partial \mathbf{f}(\mathbf{x})}{\partial \mathbf{N}} \quad [47]$$

The diffusion matrix  $\mathbf{D}$  is

$$\mathbf{D} = \mathbf{S} \cdot \text{diag}(\mathbf{f}(\mathbf{x})) \cdot \mathbf{S}^\top \quad [48]$$

Therefore, the covariance matrix  $\mathbf{C}$  can be calculate numerically by solving the fluctuation dissipation equation:

$$\mathbf{J} \cdot \mathbf{C} + \mathbf{C} \cdot \mathbf{J}^\top + \mathbf{D} = \mathbf{0} \quad [49]$$

## 6. Regulator allocation to multiple targets.

When there are  $n$  targets, similarly to Eqs. 1-5, there are

$$\frac{dR^F}{dt} = k_R - g_R R^F + \sum_{i=1}^n (-k_{i+} T_i^F R^F + k_{i-} T_i^C + (1 - \alpha_i) g_i T_i^C) \quad [50]$$

$$\frac{dT_i^F}{dt} = k_{T_i} - g_{T_i} T_i^F - k_{i+} T_i^F R^F + k_{i-} T_i^C + (1 - \beta_i) g_i T_i^C \quad [51]$$

$$\frac{dT_i^C}{dt} = k_{i+} T_i^F R^F - k_{i-} T_i^C - g_i T_i^C \quad [52]$$

At steady states, by adding Eqs. 50 and 52, we get

$$R^F = \frac{k_R - \sum_i \alpha_i T_i^C g_i}{g_R} \quad [53]$$

Solving Eq. 52, we get

$$T_i^F = \frac{k_{i-} + g_i}{R^F k_{i+}} T_i^C \quad [54]$$

Combining Eqs. 53 and 54, we get

$$R^F = \frac{k_R}{g_R + \sum_i Q_i} \quad [55]$$

where

$$Q_i = \alpha_i g_i \frac{k_{i+}}{k_{i-} + g_i} T_i^F \quad [56]$$

Thus,

$$\alpha_i g_i T_i^C = \frac{Q_i}{g_R + \sum_j Q_j} k_R \quad [57]$$

Eq. 57 has the exact form of current divider rule in electronics:

$$I_i = \frac{\frac{1}{R_i}}{\frac{1}{R_0} + \sum_j \frac{1}{R_j}} I_{\text{total}} \quad [58]$$

It inspires that  $R$ 's production rate ( $k_R$ ) is analogous to the total current ( $I_{\text{total}}$ ); the capability of  $T_i^C$  to consume  $R$  ( $\alpha_i g_i T_i^C$ ) is analogous to the  $i$ th branch current ( $I_i$ ); and the capability of  $T_i^F$  to occupy  $R$  ( $Q_i$ ) is analogous to the  $i$ th branch conductance ( $1/R_i$ ).

When  $R$  is scarce,  $T_i^F \simeq T_i^0$ , thus Eq. 56 is approximated to

$$Q_i \simeq \alpha_i g_i \frac{k_{i+}}{k_{i-} + g_i} T_i^0 \quad [59]$$

which indicates that in the “ $R$  scarce” regime, the capability of  $T_i$  to occupy  $R$  (resistance) is only determined by the parameter settings of  $T_i$ .

For catalytic reactions with a constant level of enzyme (regulator) and substances (targets), Eqs. 50-52 degenerate as

$$\frac{dR^F}{dt} = \sum_{i=1}^n (-k_{i+} T_i^F R^F + k_{i-} T_i^C + g_i T_i^C) \quad [60]$$

$$\frac{dT_i^F}{dt} = -k_{i+} T_i^F R^F + k_{i-} T_i^C \quad [61]$$

$$\frac{dT_i^C}{dt} = k_{i+} T_i^F R^F - k_{i-} T_i^C - g_i T_i^C \quad [62]$$

Under the assumption of Michaelis-Menten kinetics that  $\frac{dT_i^C}{dt} = 0$ , define  $K_i = (k_{i-} + g_i)/k_{i+}$ , then we get

$$T_i^C = \frac{T_i^F}{K_i} R^F \quad [63]$$

Thus,

$$R^{\text{total}} = R^F + \sum_j T_j^C = R^F (1 + \sum_j T_j^F / K_j) \quad [64]$$

$$R^F = \frac{1}{1 + \sum_j T_j^F / K_j} R^{\text{total}} \quad [65]$$

$$T_i^C = \frac{T_i^F / K_i}{1 + \sum_j T_j^F / K_j} R^{\text{total}} \quad [66]$$



Which is the formation of enzyme allocation in Michaelis-Menten kinetics systems (Chou and Talaly, 1977).

## 7. Simulation parameters for drawing figures.

The scales of simulation parameters are referenced from previous publications across different competition scenarios, such as transcription (Jayanthi et al., 2013), post-transcription (Ala et al., 2013; Schmiedel et al., 2015), translation (Goroehowski et al., 2016), degradation (Cookson et al., 2011) and chemical buffer solutions. Table S1 lists the parameters for drawing figures, the scales of which are derived from previous researches on ceRNA effects (Ala et al., 2013; Yuan et al., 2015; Yuan et al., 2016). All gradually changing parameters are shown in figures. In Figure 2F-G and S2D-E,  $k_{T2} = 1 \times 10^{-2}$ . In Figure 2I,  $k_{T2} = 1 \times 10^{-4}$ , and parameters of  $T_3$  are shown in Table S1. In Figure 3A-C and S3A-F,  $g_1 = 4 \times 10^{-5}$ ,  $k_{T2} = 1 \times 10^{-4}$ . In Figure S3A,  $g_2 = 3.2 \times 10^{-4}$ . In Figure 3E-H, for dashed blue lines,  $k_R = 5 \times 10^{-3}$ ; for thick blue lines,  $k_R = 7.81 \times 10^{-5}$ ; for thick green lines,  $k_R = 5 \times 10^{-3}$ ,  $k_{T2} = 3.21 \times 10^{-2}$ . In Figure S3G-J,  $k_{T1} = 5 \times 10^{-3}$ .

**Table S1. Primary parameters for simulations**

| Primary parameters   |                    |                       |                       | Additional parameters<br>for Figure 2I |                    |                       |                    |
|----------------------|--------------------|-----------------------|-----------------------|----------------------------------------|--------------------|-----------------------|--------------------|
| <i>R</i>             |                    | <i>T</i> <sub>1</sub> | <i>T</i> <sub>2</sub> | <i>T</i> <sub>3</sub>                  |                    |                       |                    |
| <i>k<sub>R</sub></i> | $5 \times 10^{-3}$ | <i>k<sub>T1</sub></i> | $1 \times 10^{-3}$    | <i>k<sub>T2</sub></i>                  | $8 \times 10^{-3}$ | <i>k<sub>T3</sub></i> | $5 \times 10^{-4}$ |
| <i>g<sub>R</sub></i> | $1 \times 10^{-4}$ | <i>g<sub>T1</sub></i> | $1 \times 10^{-5}$    | <i>g<sub>T2</sub></i>                  | $1 \times 10^{-5}$ | <i>g<sub>T3</sub></i> | $1 \times 10^{-5}$ |
|                      |                    | <i>k<sub>1+</sub></i> | $1 \times 10^{-4}$    | <i>k<sub>2+</sub></i>                  | $1 \times 10^{-4}$ | <i>k<sub>3+</sub></i> | $1 \times 10^{-6}$ |
|                      |                    | <i>k<sub>1-</sub></i> | $5 \times 10^{-5}$    | <i>k<sub>2-</sub></i>                  | $5 \times 10^{-5}$ | <i>k<sub>3-</sub></i> | $5 \times 10^{-5}$ |
|                      |                    | <i>g<sub>1</sub></i>  | $8 \times 10^{-5}$    | <i>g<sub>2</sub></i>                   | $8 \times 10^{-5}$ | <i>g<sub>3</sub></i>  | $1 \times 10^{-5}$ |
|                      |                    | <i>α</i> <sub>1</sub> | 1                     | <i>α</i> <sub>2</sub>                  | 0.5                | <i>α</i> <sub>3</sub> | 0.5                |
|                      |                    | <i>β</i> <sub>1</sub> | 1                     | <i>β</i> <sub>2</sub>                  | 1                  | <i>β</i> <sub>3</sub> | 1                  |
|                      |                    | <i>k<sub>P1</sub></i> | $1 \times 10^{-2}$    |                                        |                    |                       |                    |
|                      |                    | <i>g<sub>P1</sub></i> | $5 \times 10^{-6}$    |                                        |                    |                       |                    |

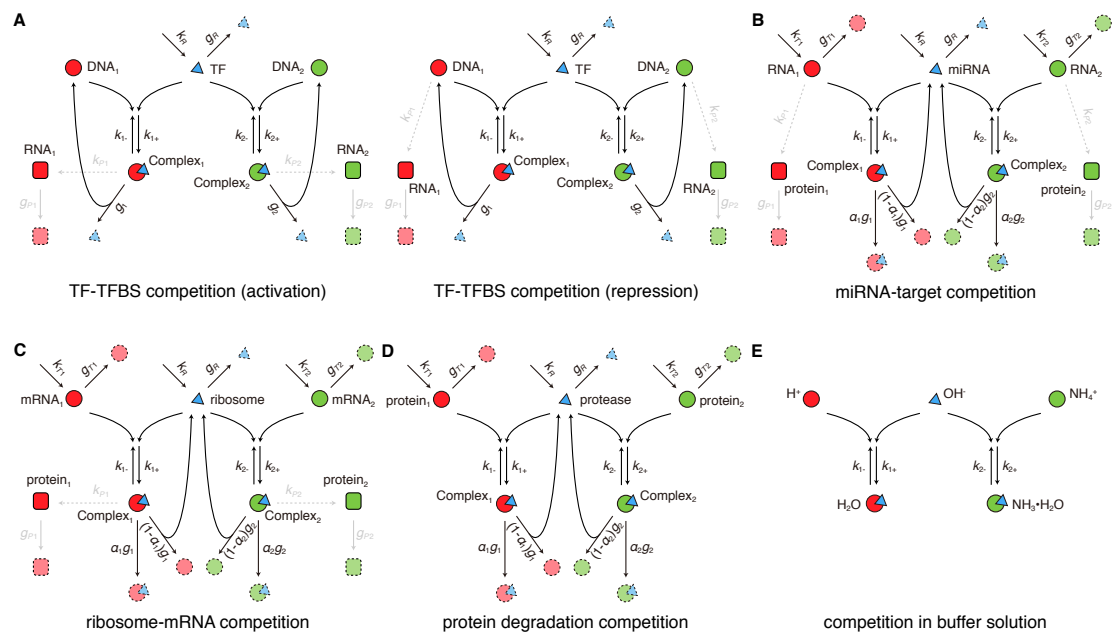

**Figure S1** Detailed descriptions under the unified coarse-gained competition motif model for diverse competition scenarios.

(A) DNA TF binding sites (TFBS) competing for TFs. Left: TF acts as an activator; right: TF acts as a repressor.

(B) RNA molecules competing for miRNAs.

(C) RNA molecules competing for ribosomes.

(D) Proteins competing for proteases.

(E) Competition in the ammonium buffer solution, where H<sup>+</sup> and NH<sub>4</sub><sup>+</sup> compete for OH<sup>-</sup>.

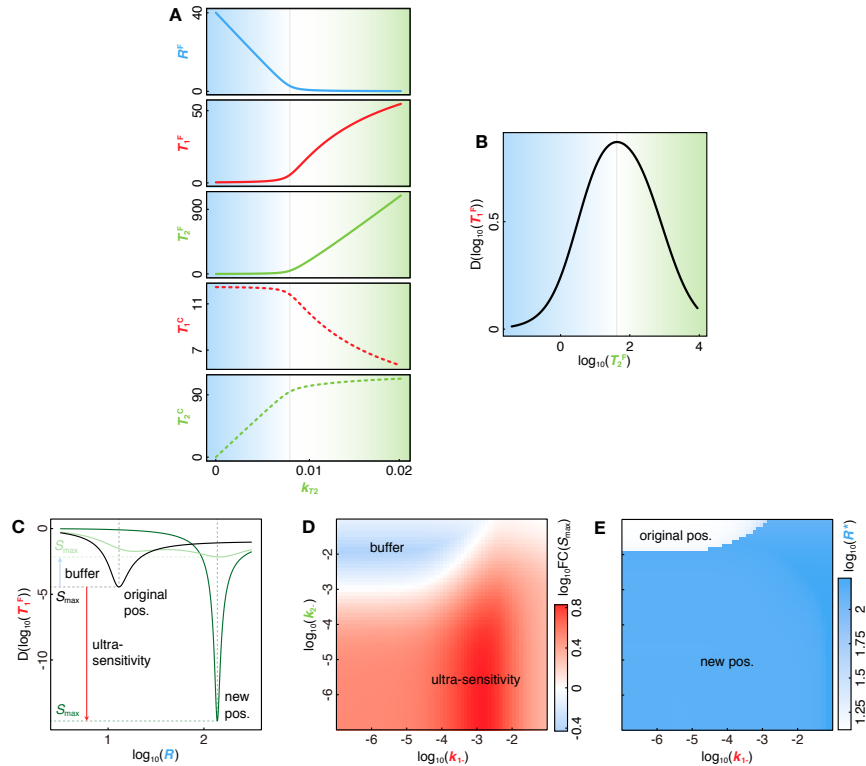

**Figure S2** Steady state behaviors of competition systems.

(A) Abundances of each component in Figure 2A on linear scales.

(B) Derivatives of the curve in Figure 2B. Each component's abundance in competition motif changing with  $T_2$ 's production rate ( $k_{T2}$ ). Colors, lines and parameter settings are the same with Figure 2A-C.

(C) Schematic diagram depicting the maximum sensitivity ( $S_{max}$ ) and its position ( $R^*$ ) of  $R$ - $T_1$  dose-response curves. Dose-response curves are adopted from Figure 3G.

(D-E) Relative binding affinities of  $T_1$  and  $T_2$  ( $k_1$ - and  $k_2$ -) shape  $R$ - $T_1$  dose-response curves. (D) Fold change of  $S_{max}$  compared with that of non-competing system ( $k_{T2}=0$ ). Competition of  $T_2$  buffers the response of  $T_1^F$  to  $R$  when  $\log_{10}FC(S_{max}) < 0$ , but introduces larger sensitivity when  $\log_{10}FC(S_{max}) > 0$ . (E) Changes of  $R^*$ .

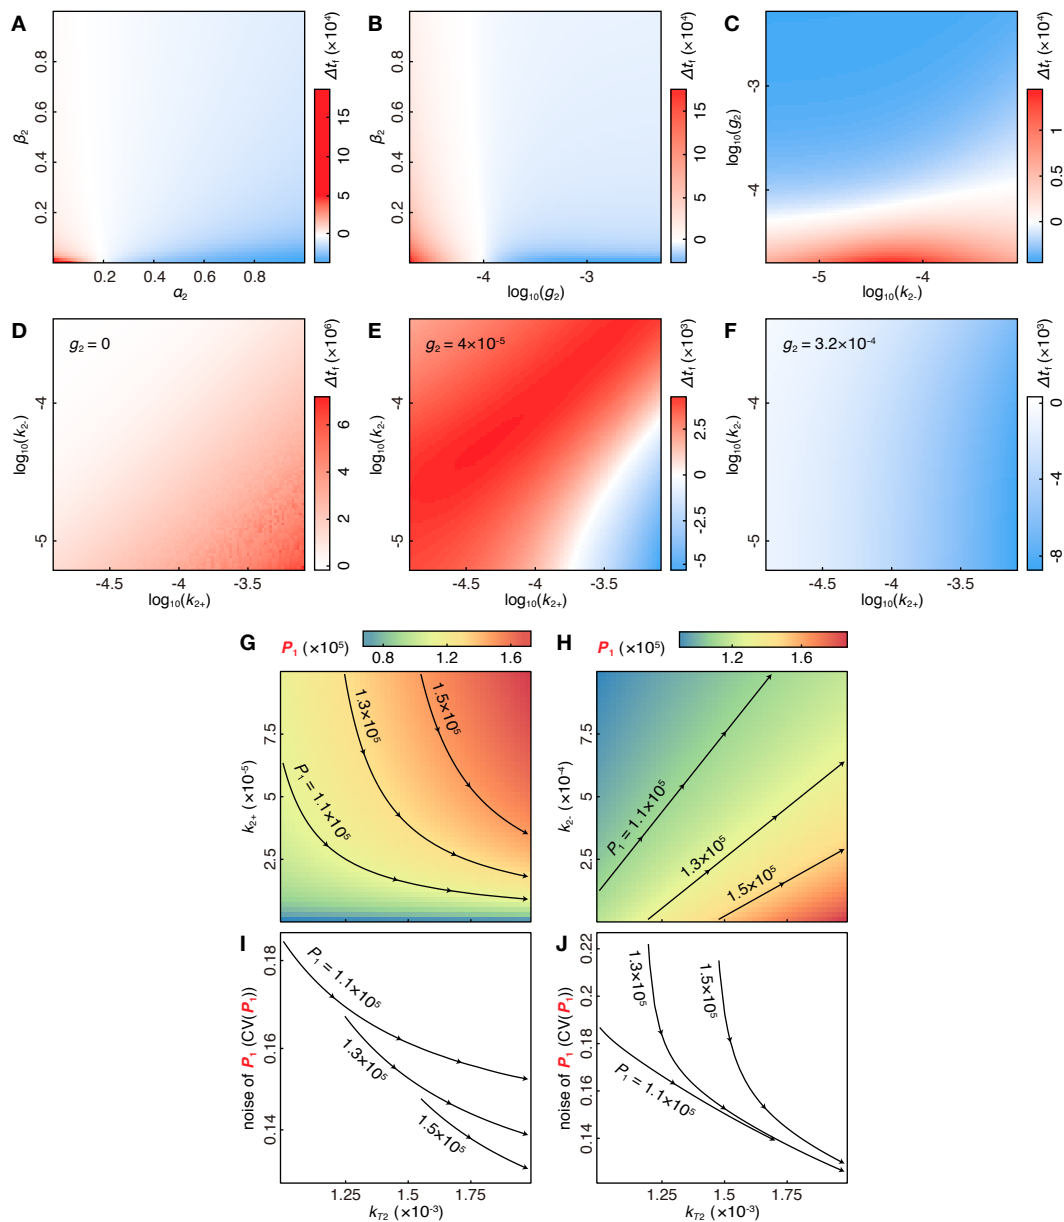

**Figure S3** Dynamic properties of competition systems.

(A-F) Modifications of response time on the falling edge of  $R$ 's change under different kinetic parameters: (A) different  $\alpha_2$  and  $\beta_2$ ; (B) different  $g_2$  and  $\beta_2$ ; (C) different  $k_{2-}$  and  $g_2$ ; (D-F) different  $k_{2+}$ ,  $k_{2-}$  and  $g_2$  (values of  $g_2$  are shown in figures).

(G-J) Abundant weak competitors can buffer target expression noise better. (G-H)  $P_1$  level changing with  $T_2$ 's production rate ( $k_{72}$ ) and  $T_2$ 's association rate ( $k_{2+}$ ) (G), or  $k_{72}$  and  $T_2$ 's dissociation rate ( $k_{2-}$ ) (H). Black lines are  $T_1^F$  level isolines. (I-J) Target expression noise changes on the isolines in (G) and (H) respectively. Along the direction of the arrows,  $T_2$ 's production increases and  $T_2$ 's binding affinity decreases, bringing about lower expression noise.
